# Glucagon-like peptide-1 receptor agonists modestly reduced blood pressure among patients with and without diabetes mellitus: A meta-analysis and meta-regression

**Short title:** GLP-1 receptor agonists and blood pressure reduction

**Frederick Berro Rivera, MD;**<sup>1</sup> Grace Nooriza O. Lumbang, MD;<sup>2</sup> Danielle Rose Magno Gaid, MD;<sup>2</sup> Linnaeus Louisse A. Cruz, MD;<sup>3</sup> John Vincent Magalong, MD;<sup>3</sup> Nathan Ross B. Bantayan, BSc;<sup>3</sup> Kyla M. Lara-Breitinger, MD;<sup>4</sup> Martha Gulati, MD MS;<sup>4</sup> George Bakris, MD<sup>6</sup>

<sup>1</sup>Department of Medicine, Lincoln Medical Center, New York, NY, USA

<sup>2</sup>Cebu Institute of Medicine, Cebu City, Philippines

<sup>3</sup>University of the Philippines College of Medicine, Manila, Philippines

<sup>4</sup>Department of Cardiovascular Medicine, Mayo Clinic, Rochester, Minnesota, (MN), USA

<sup>5</sup>Department of Cardiology, Barbra Streisand Women's Heart Center, Cedars-Sinai Smidt Heart Institute, Los Angeles, CA, USA

<sup>6</sup>Department of Medicine, University of Chicago, Chicago (IL), USA

Abstract Word Count: 250

Manuscript word count: 5,857

Funding: None

Disclosures:

*MG: Consultant Fees/Honoraria:* Esperion, Novartis, and Boehringer Ingelheim

*Research/Research Grants:* Congressionally Directed Medical Research Program-Department of Defense (*WARRIOR study*)

## Address for Correspondence:

George Bakris, MD

University of Chicago

Goldblatt Pavilion, 5841 S Maryland Ave, Chicago, IL 606337

Email: gbakris@gmail.com

## ABSTRACT

**Background.** The cardiovascular benefits provided by glucagon-like peptide-1 receptor agonists (GLP-1RAs) extend beyond weight reduction and glycemic control. One possible mechanism may relate to blood pressure (BP) reduction. We aim to quantify the BP lowering effect by GLP-1RAs.

**Methods.** A comprehensive database search for placebo-controlled randomized controlled trials (RCTs) on GLP-1RA treatment was conducted until December 2023. Data extraction and quality assessment were carried out, employing a robust statistical analysis using a random effects model to determine outcomes with mean difference (MD) in millimeters mercury (mmHg) and 95% confidence intervals (CIs). The primary endpoint was the mean difference in systolic and diastolic BP. Subgroup analyses and meta-regression were done to account for covariates.

**Results.** Compared to placebo, GLP-1RAs modestly reduced SBP (semaglutide: MD -3.40, [95% CI -4.22 to -2.59,  $p < 0.001$ ], liraglutide: MD -2.61, [95% CI -3.48 to -1.74,  $p < 0.001$ ], dulaglutide: MD -1.46, [95% CI -2.20 to -0.72,  $p < 0.001$ ] and exenatide: MD -3.36, [95% CI -3.63 to -3.10,  $p < 0.001$ ]). This benefit consistently increased with longer treatment duration. Established people with type 2 diabetes experienced less SBP lowering with semaglutide. DBP reduction was only significant in the exenatide group (MD -0.94, [95% CI -1.78 to -0.1],  $p = 0.03$ ). Among semaglutide cohorts, mean change in hemoglobin A1c and mean change in body mass index were directly associated with SBP reduction.

**Conclusion.** Patients on GLP-1RA experienced modest SBP lowering compared to placebo. Only exenatide reduced DBP. Further studies are needed to clarify the mechanisms and the clinical benefit of GLP-1RA effects in BP reduction.

**Keywords:** Glucagon-like peptide-1 receptor agonists, GLP-RA, blood pressure, semaglutide, liraglutide, exenatide, dulaglutide

## **Abbreviations**

BP = blood pressure

BMI=body mass index

DBP = diastolic blood pressure

GLP-1RA = glucagon-like peptide-1 receptor agonists

MD= mean difference

RCTs = randomized controlled trials

SBP = systolic blood pressure

T2DM= type 2 diabetes mellitus

## INTRODUCTION

In recent years, glucagon-like peptide-1 receptor agonists (GLP-1RAs) have emerged as a first-line drug in the treatment of type 2 diabetes mellitus (T2DM).<sup>1</sup> GLP-1RAs have also been found to significantly reduce the risk of major adverse cardiovascular events (MACE) in patients with T2DM, as demonstrated by multiple large cardiovascular outcome trials (CVOTs).<sup>2</sup> Recently, the STEP-HFpEF (Semaglutide in Patients with Heart Failure with Preserved Ejection Fraction and Obesity) and SELECT (Semaglutide Effects on Cardiovascular Outcomes in People With Overweight or Obesity) trials, found that semaglutide led to improvements in symptoms, physical limitations, and exercise function in patients with heart failure, as well as decreased the risk of MACE in overweight and obese patients.<sup>3, 4</sup> The available evidence demonstrates the significance of GLP-1 receptor agonists in the treatment of obesity and the reduction of cardiovascular risk in patients with type 2 diabetes mellitus.<sup>5, 6</sup> The cardiovascular benefits provided by GLP-1RAs are found to be significant, independent of its effects on glycemic control.<sup>7</sup> However, the specific mechanisms underlying the cardiovascular protection provided by GLP-1RAs have not yet been fully elucidated. One such pathway may be the reduction of blood pressure, a well-known CV risk factor.<sup>8, 9</sup> GLP-1 receptors are found in the hypothalamus and brainstem, the heart and vasculature, and the kidneys, suggesting multiple potential mechanisms that underlie the blood pressure-lowering effects of GLP1-RAs, independent of their effect on glycemic control.<sup>10, 11</sup> Among these include, but are not limited to, inhibition of sympathetic nerve excitation, reduction of vascular inflammation and arterial stiffness, and promotion of natriuresis and diuresis.<sup>11</sup> Previous studies have shown that GLP-1RAs reduce blood pressure by as much as 2-3 mmHg, with systolic BP being lowered more than diastolic BP.<sup>12, 13</sup> In subsequent meta-analyses, liraglutide and semaglutide have been demonstrated to

provide a significant reduction in systolic blood pressure.<sup>14, 15</sup> Nevertheless, the significance of the effect on BP lowering by GLP1-RAs overall and across different subgroups remains inconclusive, and thus there is a need to bridge existing knowledge gaps with the latest evidence from recent trials in GLP-1RA use.

In this study, we conducted a thorough systematic review and meta-analysis of RCTs on the four widely used GLP-1RAs (Semaglutide, Liraglutide, Exenatide and Dulaglutide). We aim to determine the efficacy of GLP-1RA in reducing SBP and DBP across different GLP-1RAs. Subgroups based on dose, treatment duration, baseline mean SBP and DM status, as well as regression analyses were done to account for covariates.

## METHODS

This study was reported under the Preferred Reporting Items for a Review and Meta-Analysis (PRISMA)<sup>16</sup>, and the checklist<sup>17</sup> was followed (**Figure S1**). Certainty of evidence was rated using the Grades of Recommendation, Assessment, Development, and Evaluation (GRADE) framework.<sup>18</sup> This study was registered in the International Prospective Register of Systematic Reviews (PROSPERO)<sup>19</sup>, with the identification number CRD42024497765.

### Data Sources and Searches

The literature search was performed using PubMed/MEDLINE, Ovid/Embase, and clinicaltrial.gov databases from database inception until December 2023. Search terms included "glucagon-like peptide-1 receptor agonists", "GLP-1 agonist", "GLP-1RA", "semaglutide", "dulaglutide", "exenatide", "liraglutide", "placebo", "blood pressure", "systolic blood pressure", "diastolic blood pressure", "randomization", "clinical trials", "intervention studies" and

synonyms. Citations of selected articles and any relevant studies that evaluated GLP-1RA and blood pressure reduction were reviewed. After removing duplicates, records were reviewed at the title and abstract level, followed by the screening of full text based on our study criteria.

## **Study Selection**

Eligible phase II or phase III, double-blind randomized controlled trials (RCTs) comparing treatment with GLP-1RA with placebo in adult patients aged 18 years and above were included. Moreover, the studies must have reported baseline SBP and DBP and blood pressure reduction in weighted mean difference. Studies must have reported the mean change in weight, mean change in hemoglobin A1c, and mean change in body mass index. Furthermore, studies must have data on the baseline mean SBP and DBP and must mention the diabetes status of the cohort. Studies were excluded if (1) they did not report a control arm, (2) there was an active comparator, and (3) mean change was not reported. Other agents such as albiglutide, lixisenatide, efpeglenatide, were excluded because cardiovascular outcomes are not well established with these agents. We also excluded RCTs with participants younger than 18, and those reporting interim or post hoc analysis. Cross-over trials were also excluded due to the nature of the outcomes considered. Review articles, case reports, letters to the editor, commentaries, proceedings, laboratory studies, and other non-relevant studies were excluded as well.

## **Data Extraction**

Key participant and intervention characteristics and reported data on efficacy outcomes were extracted independently by two investigators (GOL and DMG) using standard data extraction templates. Any disagreements were resolved by discussion or, if required, by a third author (FBR). Data on the following variables were extracted: first author's name, year of publication,

journal, study phase, interventional and control treatments, randomization method, analysis tool, number of randomized patients, and demographic and clinical data (e.g., age, sex). In case of uncertainties regarding the study data, we contacted the authors of the specific study for additional information. Quality assessment was performed independently by two review authors using the Revised Cochrane risk-of-bias tool for randomized trials.

### **Outcome Measures**

The primary endpoint of this meta-analysis and meta-regression was the weighted mean difference (MD) in SBP and DBP. Additionally, subgroup analyses were performed for applicable studies on the (1) duration of treatment in weeks, (2) dose, (3) mode of administration, (4) mean baseline SBP, and (5) DM status of the cohorts.

### **Bias Assessment**

All included studies reported a central randomization process, and outcomes were objectively determined. The included studies reported all primary and secondary outcomes as pre-specified in their protocols, so the risk of bias for selective reporting was judged as low. Three authors (JM, DMG, and GOL) independently assessed the risk of bias based on the Cochrane Risk of Bias Tool (**Figures S2**) for studies that fulfilled the inclusion criteria. Disagreements between the reviewers were resolved by consensus.

### **Statistical Analysis**

We pooled all estimates using a random effects model based on the restricted maximum likelihood (REML) model. Effect sizes were expressed using mean differences with 95% confidence intervals (CIs). Funnel plot and Egger test were used for estimation of publication

bias. For all outcomes, the significance level was set at a p-value of <0.05 or 95% CI not including 1. Both Cochran's Q and Higgins and Thompson's I<sup>2</sup> statistics were generated to describe the heterogeneities among the studies. We calculated the I<sup>2</sup> statistics (0–100%) to explain the between-study heterogeneity, with I<sup>2</sup> ≤ 25% suggesting acceptable homogeneity, 25% < I<sup>2</sup> ≤ 75% suggesting moderate heterogeneity, and I<sup>2</sup> > 75% suggesting high heterogeneity. Forest plots were used to plot the effect size, either for each study or overall. Publication bias was evaluated by graphical inspection of funnel plot; estimation of publication bias was quantified by means of Egger linear regression test. Meta-regression analysis was performed, reporting results as P value. Stata version 18 (*StataCorp, College Station, TX*) was used to conduct the included studies' meta-analyses and meta-regression.

## RESULTS

A literature search through December 2023, yielded 4,178 potentially relevant references on GLP-1RA. (**Figure S1**). Of these, 1,156 duplicates were removed. A total of 1,221 studies with unrelated interventions, outcomes, populations, non-original data (e.g., meta-analysis or review), descriptive or observational study design, and study protocols were excluded. 635 articles were removed for not meeting the eligibility criteria. The remaining 66 related studies were retrieved as full-text publications for detailed evaluation. Finally, 63 studies were included in the final meta-analysis. 53,072 participants were included, 32,113 (60.51%) of which are females. The rest of study characteristics are shown in **Table 1**. Majority of the RCTs were multinational and sponsored by drug companies.

Liraglutide had the most RCTs with 30 studies<sup>20-49</sup> having it as the intervention. There were 16 RCTs<sup>3, 4, 50-63</sup> done for Semaglutide and 5 for dulaglutide.<sup>64-68</sup> Exenatide had 12 RCTs.<sup>69-80</sup> Thirty-eight (38) RCTs<sup>21, 24, 26, 29, 31, 33, 36-38, 41, 43, 44, 47, 51, 55-60, 62, 64-70, 72, 74, 76-78, 80, 81</sup> were done



exclusively among patients with DM. Among these RCTs, majority<sup>21, 24, 26, 41, 43, 44, 47, 51, 55, 60, 64, 68, 74, 76-78, 80-82</sup> enrolled exclusively T2DM patients. Seven (7) RCTs<sup>20, 25, 27, 49, 50, 79, 83</sup> enrolled both patients with or without diabetes. The remaining eighteen RCTs did not include patients with DM, three (3)<sup>34, 39, 40</sup> of which included exclusively patients with prediabetes.

Among the RCTs in this study, 61 have data for SBP<sup>3, 4, 20, 21, 23-29, 31-46, 48-51, 53-81, 83</sup>. Conversely, 55 RCTs have data for DBP. The method of BP measurement varied among the RCTs. Five (5) RCTs<sup>29, 37, 41, 66, 72</sup> used continuous or 24-hour ambulatory blood pressure monitoring (ABPM). Among these, Bojer et al. (2021)<sup>29</sup> performed orthostatic BP measurement with supine and standing BP readings. The remaining 58 RCTs did not employ continuous BP monitoring, but instead utilized routine BP measurements, which were performed at specified intervals; methodology varied among these studies: 22 RCTs<sup>21, 28, 31, 34, 35, 38, 44, 46, 47, 50, 51, 53-55, 57, 61, 64, 65, 68, 75, 78, 79</sup> used seated blood pressure, Gullaksen et al. (2023)<sup>62</sup> used supine BP, Wadden et al. (2019)<sup>48</sup> used standing BP, Dushay et al. (2012)<sup>71</sup> did not mention the posture of the patient but used a Dynamap automated monitoring device, and 33 other RCTs did not explicitly mention the method of routine BP measurement.

Forty-four (44) RCTs included patients with CKD, but many trials employed a varying cutoff eGFR to exclude patients with more severe CKD: Klausen et al., 2022<sup>73</sup> excluded patients with eGFR = 50 mL/min/1.73 m<sup>2</sup> and/or microalbuminuria. Gullaksen et al., 2023<sup>62</sup> excluded patients with eGFR < 45 mL/min/1.73 m<sup>2</sup>. STEP 6<sup>50</sup> excluded patients with eGFR < 30 mL/min/1.73 m<sup>2</sup> if the patient has T2DM (only in Japan) but excluded patients with eGFR < 15 mL/min/1.73 m<sup>2</sup> if the patient has no T2DM. Eighteen (18) RCTs<sup>20, 21, 25, 41, 42, 46, 49, 51, 55-58, 64-66, 77-79</sup> excluded patients with eGFR < 30 mL/min/1.73 m<sup>2</sup>; among these 18 trials, PIONEER 5<sup>55</sup> specifically excluded patients with rapidly progressive renal disease or known nephrotic

albuminuria ( $> 2200$  mg/24 hr or  $> 2200$  mg/g), Ferdinand et al., 2014<sup>66</sup> also excluded patients with  $eGFR = 30$  mL/min/1.73 m<sup>2</sup>, DURATION-7<sup>77</sup> further excluded patients on metformin with  $eGFR < 60$  mL/min/1.73 m<sup>2</sup>, serum creatinine  $\geq 1.5$  mg/dL in men, or  $\geq 1.4$  mg/dL in women. Six (6) RCTs<sup>3, 4, 52-54, 63</sup> excluded patients with  $eGFR < 15$  mL/min/1.73 m<sup>2</sup>. Ten (10) RCTs did not mention CKD or renal disease as an exclusion criterion. Idorn et al. (2016)<sup>33</sup> specifically included patients with end-stage renal disease. Six (6) RCTs<sup>24, 26, 27, 35, 39, 67</sup> used exclusively a serum creatinine (sCr) level as a cutoff to exclude patients with CKD, with three (3) RCTs<sup>26, 27, 39</sup> excluding patients with  $sCr > 150$   $\mu$ mol/L; of these 3, Larsen et al., 2017<sup>39</sup> excluded patients with macroalbuminuria. The 3 other RCTs have sCr cutoff values as follows: ELEGANT<sup>24</sup> excluded patients with  $sCr > 130$   $\mu$ mol/L, Kuhadiya et al. (2016)<sup>35</sup> excluded patients with  $sCr > 1.5$  mg/dL, and Grunberger et al. (2012)<sup>67</sup> excluded patients with  $sCr \geq 1.5$  mg/dL in men or  $\geq 1.4$  mg/dL in women. However, using a serum creatinine value as an exclusion criterion can end up including patients with CKD despite having a normal sCr, which tends to occur in the elderly.<sup>84</sup>

Eighteen (18) RCTs excluded patients with CKD, twelve (12)<sup>23, 29, 36-38, 43, 47, 59, 60, 75, 80, 83</sup> of which used an  $eGFR$  cutoff of  $< 60$  mL/min/1.73 m<sup>2</sup>, while six (6)<sup>31, 34, 44, 48, 70, 76</sup> did not use an  $eGFR$  cutoff but excluded patients with known CKD. For the remaining trial, which is Astrup et al., 2009<sup>28</sup>, it was not clear if CKD patients are excluded since “major medical conditions” was an exclusion criterion, but it did not explicitly mention as to whether CKD is a major medical condition.

The reporting of baseline blood pressure varied among RCTs. Among them, nine (9)<sup>36, 38, 46, 52, 54, 59, 60, 71, 78</sup> RCTs reported a mean baseline SBP that included all treatment groups. Of these 9 RCTs, five (5)<sup>46, 52, 54, 71, 78</sup> have a mean SBP of 120-129 mmHg at baseline, three (3)<sup>36, 59, 60</sup> have a mean baseline SBP 130-139, and only one<sup>38</sup> have mean baseline SBP  $\geq 140$ . Forty-

five (45) studies did not report a mean across all treatment groups but reported means of each treatment arm. Of these 45 RCTs, two (2) have treatment arms with mean SBPs belonging to different ranges. Conversely, the other 43 RCTs have either only 1 treatment arm or have multiple treatment arms with mean SBPs belonging to the same range: 18 RCTs<sup>20, 21, 23, 28, 32, 35, 39, 40, 42, 45, 53, 63, 66, 67, 69, 79, 83</sup> have a treatment arm with mean SBP of 120-129 mmHg at baseline, 24 RCTs<sup>3, 4, 24, 25, 27, 29, 37, 43, 44, 47-51, 56, 62, 64, 65, 70, 72, 74, 75, 77, 80</sup> have a treatment arm with mean baseline SBP 130-139, and only one<sup>31</sup> have a treatment arm with mean baseline SBP  $\geq 140$ . The remaining nine (9)<sup>26, 33, 41, 55, 57, 58, 61, 68, 73</sup> RCTs did not mention any baseline SBP.

## Systolic blood pressure reduction

### Semaglutide

Semaglutide significantly reduced SBP with a MD of -3.40, (95% CI, -4.22 to -2.59),  $p < 0.001$ , ( $I^2$  87.78;  $p < 0.001$ ). Subgroup analysis based on the mode of administration showed significant SBP reduction for both oral (MD: -4.06, 95% CI (-5.19 to -2.93),  $p < 0.001$ ) and subcutaneous (MD: -3.40, 95% CI (-4.13 to -2.31),  $p < 0.001$ ) semaglutide. (See figure 1) Subgroup analysis based on treatment duration showed significant SBP reduction for patients who received treatment for more than 26 weeks (MD: -4.23, 95% CI (-5.02 to -3.44),  $p < 0.001$ ) compared to those who received the treatment for 26 weeks or less (MD: -0.65, 95% CI (-1.13 to -0.16),  $p < 0.001$ ),  $p$ -interaction  $< 0.001$ ). (See figure 2) Subgroup analysis for subcutaneous Semaglutide based on dosing showed significant SBP reduction for patients who received a dose of  $> 1$  mg (MD: -4.57, 95% CI (-5.89 to -3.26),  $p < 0.001$ ) compared to those who received a dose of 1 mg or less (MD: -2.52, 95% CI (-3.44 to -1.59),  $p < 0.001$ ), ( $p$ -interaction NS). (See figure S3) Subgroup analysis based baseline mean SBP showed significant SBP reduction for patients who had a mean SBP between 120-129 mmHg (MD: -5.19, 95% CI (-7.28 to -3.09),  $p < 0.001$ )

compared to those who had a mean SBP between 130-139 mmHg (MD: -2.66, 95% CI (-3.84 to -1.48),  $p < 0.001$ ), (p-interaction  $< 0.04$ ). (See figure 3) Subgroup analysis based on DM status showed significant reduction in SBP among those without DM (MD: -4.60, 95% CI -5.61 to -3.59,  $p < 0.01$ ) versus among those with DM (MD: -2.15, 95% CI -3.14 to -1.15,  $p < 0.01$ ), (p-interaction  $< 0.01$ ). (See figure 4)

### **Liraglutide**

Liraglutide significantly reduced SBP with a MD of -2.61 (95% CI, -3.48 to -1.74),  $p < 0.001$ . Subgroup analysis based on treatment duration showed significant SBP reduction for both those who received treatment for more than 24 weeks (MD: -2.35, 95% CI (-3.44 to -1.25),  $p < 0.001$ ) and to those who received the treatment for 24 weeks or less (MD: -3.11, 95% CI (-4.40 to -1.83),  $p < 0.001$ ), p-interaction  $< NS$ ). (See figure 5) Subgroup analysis based on dosing showed similar significant SBP reduction for patients who received a dose of  $> 1.8$  mg (MD: -2.65, 95% CI (-4.40 to -0.89),  $p < 0.001$ ) and to those who received a dose of 1.8 mg or less (MD: -2.68, 95% CI (-3.46 to -1.91),  $p < 0.001$ ), p-interaction NS). (See figure S4) Subgroup analysis based on the mean baseline SBP showed significant SBP reduction for patients who had baseline SBP of 120-129 mmHg (MD: -2.64, 95% CI (-3.36 to -1.93),  $p < 0.001$ ) than those who had a mean baseline SBP of 130-139 mmHg (MD: -0.98, 95% CI (-3.03 to 1.07),  $p = 0.035$ ). (See figure S5) Subgroup analysis based on DM status showed significant reduction in SBP for both those without DM (MD: -2.92 mmHg, 95% CI -4.54 to -1.30,  $p < 0.01$ ) versus among those with DM (MD: -2.57, 95% CI -3.39 to -1.76,  $p < 0.01$ ), (p-interaction NS). (See figure S6)

### **Dulaglutide**

Dulaglutide significantly reduced systolic blood pressure with a MD of -1.46 (95% CI, -2.20 to -0.72),  $p < 0.001$ . Subgroup analysis based on treatment duration both showed significant SBP reduction for patients who received treatment for 24 weeks or more (MD: -1.14, 95% CI (-2.09 to -0.19),  $p < 0.001$ ) compared to those who received the treatment for less than 24 weeks (MD: -2.00 95% CI (-2.20 to -0.72),  $p < 0.001$ ),  $p$ -interaction NS). (See figure 6) Subgroup analysis based on dosing showed significant SBP reduction for patients who received a dose of 1 mg or more (MD: -1.90, 95% CI (-2.92 to -0.88),  $p < 0.001$ ) compared to those who received a dose of less than 1 mg (MD: -0.84, 95% CI (-1.81 to -0.13),  $p < 0.001$ ),  $p$ -interaction NS). (See figure S7) Subgroup analysis based on the mean baseline SBP showed significant SBP reduction for patients who had baseline SBP of 120-129 mmHg (MD: -2.11, 95% CI (-2.79 to -1.43),  $p < 0.001$ ) than those who had a mean baseline SBP of 130-139 mmHg (MD: -1.11, 95% CI (-2.28 to 0.05),  $p = 0.06$ ). (See figure S8)

### **Exenatide**

Exenatide significantly reduced SBP with a MD of -3.36, (95% CI, -3.63 to -3.10),  $p < 0.001$ . Subgroup analysis based on treatment duration both showed significant SBP reduction for patients who received treatment for 24 weeks or more (MD: -3.37, 95% CI (-3.63 to -3.11),  $p < 0.001$ ) compared to those who received the treatment for less than 24 weeks (MD: -1.63, 95% CI (-5.63 to 2.36),  $p = 0.42$ ),  $p$ -interaction NS). (See figure S9) Subgroup analysis based on the mean baseline SBP showed similar significant SBP reduction for patients who had baseline SBP of 120-129 mmHg (MD: -2.75, (95% CI -5.22 to -0.27,  $p = 0.03$ ) and those who had a mean baseline SBP of 130-139 mmHg (MD: -3.37, 95% CI (-3.73 to -3.00),  $p = 0.00$ ). (See figure 10)

### **Diastolic blood pressure reduction**

Semaglutide (MD: -0.72, (95% CI, -1.54 to -0.10,  $p=0.08$ ), liraglutide (MD: -0.23 (95% CI, -0.59 to 0.12,  $p=0.68$ ), and dulaglutide (MD: 0.27 (95% CI, -0.05 to 0.59,  $p=0.10$ ) failed to reduce DBP. Exenatide modestly reduced DBP (MD: -0.94 (95% CI, -1.78 to -0.10,  $p=0.03$ ).

### **Meta-regression analysis**

Meta-regression analysis revealed that mean change in weight ( $p=0.02$ ,  $\tau^2$  3.047,  $R^2$  analog=37.65), (**Figure S11**) mean change in A1c ( $p=0.010$ ,  $\tau^2$  2.989,  $R^2$  analog=28.27) (**Figure S12**) and mean change in BMI ( $p=0.00$ ,  $\tau^2$  0.165,  $R^2$  analog=92.57) (**Figure S13**) were associated with the treatment effect for SBP reduction for semaglutide. For exenatide, only the mean change in A1c affected the treatment effect ( $p=0.03$ ,  $\tau^2$  9.8,  $R^2$  analog=80.20). For dulaglutide, mean change in A1c ( $p=0.002$ ,  $\tau^2$  0.1308,  $R^2$  analog=81.80) and mean change in weight ( $p=0.00$ ,  $\tau^2$  6.6,  $R^2$  analog=100.00) affected the treatment effect. These factors did not affect the treatment effect for liraglutide.

## **DISCUSSION**

We completed a detailed meta-analysis and meta-regression on the efficacy of the four common GLP-1RAs in reducing blood pressure. We established that GLP-1RAs reduced SBP by 1.46 to 3.40 mmHg. Semaglutide, liraglutide, dulaglutide and exenatide all reduced SBP to a certain degree. Through regression analyses, we established that mean change in weight, mean change in A1c, and mean change in BMI were directly associated with SBP reduction. Subgroup analyses done between dose and route of semaglutide and its effect on SBP revealed statistically significant, but clinically modest SBP reduction that was comparable between two dose groups of semaglutide (high vs low dose regimen) and between two different routes of administration (oral vs subcutaneous). Those with lower mean baseline SBP experienced greater BP lowering

effect. Furthermore, greater SBP reduction was noted among patients who received longer duration of semaglutide treatment compared to those who had shorter treatment duration. Comparing patients with vs without T2DM, we found that semaglutide modestly reduced SBP with statistical significance among those without T2DM compared to those with T2DM, while liraglutide modestly reduced SBP in both cohorts. Contrary to its promising effects in SBP lowering, GLP-1RA has very minimal to no effect on DBP. Of the four GLP-1RAs, only exenatide reduced DBP which was more pronounced to those without T2DM.

### **SBP reduction, Semaglutide**

We established that semaglutide demonstrated a statistically significant but clinically modest reduction in SBP compared to placebo by 3.40 mmHg. This has been demonstrated by multiple large RCTs that enrolled > 1,000 participants such as PIONEER 6<sup>56</sup>, SELECT<sup>4</sup>, and Wilding et al. (2021)<sup>63</sup>, as well as other RCTs that enrolled hundreds such as STEP 2<sup>51</sup>, STEP 6<sup>50</sup>, OASIS 1<sup>54</sup>, and O'Neil et al. (2018)<sup>61</sup>. There was substantial heterogeneity in our results ( $I^2 = 89.18\%$ ), and this can be explained by some RCTs in our study, such as STEP 5<sup>53</sup>, STEP HFpEF<sup>3</sup>, and SUSTAIN 1<sup>57</sup>, which did not demonstrate a statistically significant reduction in SBP. The results of our study were consistent with a recent meta-analysis done by Kennedy et al. (2023)<sup>85</sup>, which included 6 RCTs with 4,744 participants; this meta-analysis showed that semaglutide decreased SBP by 4.83 mmHg (95% CI, -5.65 to -4.02).

The route of administration of semaglutide had no significant effect on SBP reduction, as our study showed that orally administered semaglutide reduced SBP by 4.06 mmHg whereas subcutaneous administration reduced SBP by 3.22 mmHg (p interaction NS). This is consistent with an RCT done by Davies et al. (2017)<sup>59</sup>, which compared subcutaneous semaglutide 1 mg to varying doses of oral semaglutide (2.5 to 40 mg); a similar reduction in SBP was observed

between the two routes: 5.7 mmHg with subcutaneous semaglutide vs 5.4 to 7.8 mmHg among different oral semaglutide doses. Notedly, oral semaglutide differed from subcutaneous administration in terms of the dosage used and frequency of administration: oral semaglutide is given daily with a higher dose, whereas subcutaneous semaglutide is administered weekly.

Prolonged administration of semaglutide had a greater impact on SBP, thereby suggesting a duration-dependent effect: there was a reduction of SBP by 4.25 mmHg among trials that administered semaglutide for > 26 weeks, compared to trials that administered semaglutide for  $\leq$  26 weeks, with SBP reduction of 0.55 mmHg. Four RCTs that administered semaglutide for less than 26 weeks had no significant reduction in SBP.<sup>55, 59, 60, 62</sup> On the other hand, SBP reduction among RCTs that administered semaglutide for > 26 weeks varied, as some trials<sup>3, 53, 57</sup> failed to demonstrate significant SBP reduction but most other trials with duration > 26 weeks<sup>4, 50, 51, 54, 56, 61, 63</sup> were able to demonstrate this treatment effect.

There was a marked reduction in SBP with higher doses of subcutaneous (SC) semaglutide compared to lower doses. O'Neil et al.<sup>61</sup> successfully demonstrated a significant SBP reduction (mean -4.49 to -2.88 mmHg) between higher versus lower doses. Another trial, SUSTAIN 5<sup>58</sup>, showed that semaglutide 0.5 mg did not significantly reduce SBP by 3.30 mmHg (95% CI -6.91 to 0.31), but semaglutide 1 mg showed a significant reduction in SBP by 6.30 mmHg (95% CI -9.92 to -2.68), suggesting a possible dose-dependent effect on SBP reduction between 0.5 mg and 1 mg. Notably, patients with lower baseline SBP had a trend towards more marked SBP reduction than those with higher baseline SBP, with mean SBP reduction 5.19 mmHg (95% CI -7.28 to -3.09) among studies with mean SBP 120-129 mmHg vs studies with mean SBP 130-139 mmHg, which showed mean SBP reduction 2.66 (95% CI -3.84 to -1.48). The effect was driven mainly by 2 RCTs with mean SBP 120-129 mmHg, OASIS 1<sup>54</sup> and Wilding et al., (2021)<sup>63</sup>, which had a mean SBP reduction of 6.30 and 5.94 mmHg, respectively.



## SBP reduction, Liraglutide

Liraglutide demonstrated a statistically significant, but clinically modest SBP reduction compared to placebo with a MD of -2.61 mmHg. Two large RCTs that recruited > 1,000 participants, such as le Roux et al., 2017<sup>40</sup> and Pi-Sunyer et al., 2015<sup>45</sup> were able to successfully demonstrate this modest reduction in SBP. This effect was consistent with the finding of a pooled analysis of 6 RCTs, which enrolled 2,783 patients with type 2 diabetes mellitus, as there was a mean SBP reduction of 2.7 and 2.9 mmHg among patients with liraglutide 1.2 mg and 1.8 mg, respectively.<sup>86</sup> Another meta-analysis that included 18 RCTs with 7,616 individuals was also consistent with our study's results, as there was mean SBP reduction of 3.18 mmHg with liraglutide treatment (95% CI -4.32 to -2.05) compared to placebo.<sup>14</sup> Unlike semaglutide, treatment duration did not have a significant effect on SBP reduction. This suggests that liraglutide may only need to be given for at least 5 weeks for it to exert a decrease in SBP, as seen in Liakos et al., 2018<sup>41</sup>. Varying doses of liraglutide decreased SBP modestly with statistical significance compared to placebo, but their effects were not significantly different compared to each other. This suggests that modest SBP reduction may be attained by using a dose as low as 0.6 mg, as Kuhadiya et al. (2016)<sup>35</sup> has shown this statistically significant but clinically modest treatment effect on SBP using this dose, with decrease of SBP by 2.50 mmHg (95% CI -4.97 to -0.03).

A lower baseline SBP showed an impact on SBP reduction by liraglutide, as RCTs with mean baseline SBP 120-129 mmHg showed a statistically significant but clinically modest decrease in SBP of 2.64 (95% CI -3.36 to -1.93), whereas RCTs with mean baseline SBP 130-139 mmHg showed a trend towards, albeit nonsignificant decrease in SBP of 0.98 mmHg (95% CI -3.03 to 1.07). This was in contrast to a correlation analysis of an RCT of liraglutide for

patients with type 2 diabetes, as it showed that higher baseline SBP was associated with a greater SBP reduction with liraglutide treatment; this study attributed the finding to non-systematic measurement errors, in which a single baseline BP measurement varies from the patient's long-term average BP, a phenomenon known as "regression to the mean".<sup>87</sup> Further studies may need to be conducted to determine the relationship of baseline SBP and SBP reduction on liraglutide.

### **SBP reduction, Dulaglutide**

Dulaglutide modestly reduced SBP with a MD of -1.46 mmHg. This effect was driven by REWIND<sup>82</sup> and Ferdinand et al., (2014)<sup>66</sup> trials; however, some RCTs such as AWARD-8<sup>64</sup> and Miyagawa et al., 2015<sup>68</sup>, did not show statistically significant decrease in SBP. The results of our study were consistent with a meta-analysis of 6 RCTs on dulaglutide, which showed an SBP reduction of 2.6 mmHg (95% CI -3.8 to -1.5) compared to placebo.<sup>88</sup> Treatment duration of dulaglutide did not significantly alter the magnitude of SBP reduction. Dulaglutide dose was shown to have an effect on SBP reduction. Studies that used dulaglutide dose of less than 1 mg had a trend towards, but nonsignificant, reduction of SBP by 0.84, whereas RCTs that used dulaglutide dose of 1 mg and above had a modest decrease in SBP of 1.90 mmHg (95% CI -2.92 to -0.88). This can be explained by Miyagawa et al., 2015<sup>68</sup>, which utilized a dose of 0.75 mg but had a nonsignificant increase in SBP 0.09 mmHg (95% CI -0.12 to 0.30). These findings are suggestive of a dose-dependent response of dulaglutide and SBP.

### **SBP reduction, Exenatide**

Exenatide modestly reduced SBP with a MD of 3.36 mmHg. Our results were consistent with an earlier meta-analysis by Wang et al. (2013),<sup>89</sup> which included 7 RCTs that compared exenatide with placebo among 1,334 patients with T2DM, with a statistically significant but

clinically modest SBP reduction of 5.24 mmHg (95% CI -6.88 to -3.59). However, an RCT that used dapagliflozin and exenatide demonstrated no SBP reduction among patients treated with SBP alone, but patients treated with dapagliflozin and empagliflozin had the greatest decrease in SBP of 6.4 mmHg and 6.7 mmHg (after 1.5 and 16 weeks respectively), compared to patients treated with empagliflozin alone, as they had a decrease in SBP of 4.5 mmHg and 1.8 mmHg (after 1.5 and 16 weeks, respectively); these results indicate a synergistic effect on SBP reduction by an SGLT2i and a GLP-1RA with multiple mechanisms such as non-osmotic sodium storage, changes in baroreceptor reflex setpoint or renal sympathetic nerve activity, or a central neural pathway.<sup>90</sup>

Modest SBP reduction was noted among RCTs with longer treatment duration of at least 24 weeks. Our results indicate a duration-dependent effect of exenatide, in which SBP reduction may only occur if administered for at least 24 weeks.

## **DBP reduction**

Of the GLP-RAs included in our meta-analysis, we found that only exenatide reduced DBP with statistical significance, albeit clinically modest with a mean difference of -0.94 mmHg (95% CI, -1.78 to -0.10),  $p=0.03$ ), driven mainly by the Moretto et al. (2008) and Buse et al. (2011) trials. These findings are supported by previous meta-analyses, which also found a reduction in blood pressure with exenatide only.<sup>13, 91</sup> However, a meta-analysis by Hu et al. (2020)<sup>92</sup> found a statistically significant decrease in DBP with GLP-RAs compared to baseline, although it must be noted that this meta-analysis additionally included albiglutide and taspoglutide, which are not included in our study, and also included active comparators such as insulin, sulfonylureas, and DPP-4 inhibitors. Another meta-analysis by Wang et al. (2013)<sup>89</sup> also

found a statistically significant decrease in DBP with liraglutide in contrast to our study, but also found the same treatment effect of DBP reduction as our study with exenatide.

Our meta-analysis and previous studies demonstrate that systolic BP, not diastolic BP, is the predominant component GLP-1 receptor-mediated BP control, mainly due to its effects on extracellular volume homeostasis.<sup>93</sup> Although GLP-1 receptor agonists exert vasodilatory effects through production of NO, GLP-1RAs have also been found to improve arterial stiffness, which may attenuate the BP-lowering effect of GLP-1RAs on diastolic blood pressure.<sup>94, 95</sup>

Weight loss is a notable effect of GLP-1RAs, as shown in multiple RCTs and meta-analyses<sup>96, 97</sup> and weight loss decreases SBP by 5 mmHg among patients with hypertension and 2-3 mmHg among patients with normotension, with a dose-response relationship of around 1 mmHg per kg of weight loss.<sup>98</sup> This effect of weight loss on SBP reduction was demonstrated in our meta-regression analysis, which revealed that mean weight change was associated with modest SBP reduction for RCTs that utilized semaglutide ( $p=0.02$ ,  $\tau^2=3.047$ ,  $R^2_{\text{analog}}=37.65$ ) and dulaglutide ( $p=0.00$ ,  $\tau^2=6.6$ ,  $R^2_{\text{analog}}=100.00$ ). However, it was not demonstrated in studies that used exenatide and liraglutide. The shorter half-lives of these two medications could potentially explain the lack of association, especially that exenatide and liraglutide are administered daily and dulaglutide and subcutaneous semaglutide are administered weekly<sup>99</sup>, but more studies may be needed to further elucidate the effect of weight reduction on SBP reduction. The aforementioned meta-analysis by Hu et al. (2020)<sup>92</sup>, showed that weight loss was associated with net change in SBP and even in placebo-corrected SBP changes. A meta-analysis that included 6 RCTs on dulaglutide demonstrated that SBP reduction was mostly mediated by the weight-independent effects of dulaglutide, as only 36% of SBP reduction was mediated by weight loss<sup>88</sup>, thus indicating that dulaglutide decreases SBP not just through its effect on weight but also through other mechanisms.

Our study revealed that mean change in BMI was associated with the treatment effect for SBP reduction for semaglutide only ( $p=0.00$ ,  $\tau^2=0.165$ ,  $R^2_{\text{analog}}=92.57$ ) but not for other GLP-1RAs. Interestingly, while weight loss was associated with SBP reduction for dulaglutide, it was not consistent with BMI reduction as there was no association with SBP reduction, even though weight is a component of BMI. This could be explained by the fact that BMI (expressed in  $\text{kg/m}^2$ ) is also determined by height, and that BMI is inversely proportional to the square of height.<sup>105</sup> The effect of height could possibly blunt the effect of BMI on SBP reduction, hence the lack of association with dulaglutide, but more studies may need to be done to determine the effect of BMI on SBP reduction.

Meta-regression analysis revealed that mean change in A1C was associated with the treatment effect for SBP reduction for semaglutide ( $p=0.010$ ,  $\tau^2=2.989$ ,  $R^2_{\text{analog}}=28.27$ ), exenatide ( $p=0.03$ ,  $\tau^2=9.8$ ,  $R^2_{\text{analog}}=80.20$ ), and dulaglutide ( $p=0.002$ ,  $\tau^2=0.1308$ ,  $R^2_{\text{analog}}=81.80$ ), but not for liraglutide. The previously mentioned meta-analysis by Hu et al. (2020)<sup>92</sup> showed that HbA1c change was associated with net change in SBP and even in placebo-corrected SBP changes. However, after performing adjustment for weight change, the association between A1C reduction and SBP reduction became insignificant; this suggests that the effect of A1C reduction on BP changes may depend on weight reduction, considering that glycemic control can be achieved better with weight loss.<sup>92</sup>

### **Strength and limitations**

To our knowledge, this is the first meta-analysis and meta-regression to comprehensively report on the efficacy of GLP-1RAs in reducing blood pressure. There are several limitations that are important to note. This is a study-level meta-analysis, and we could not access individual patient data. Additional limitations include heterogeneity in GLP-1RA studies. Publication bias may

also be present, the extent of which could not fully be quantified. However, every effort possible was made to limit bias by utilizing a robust analytical approach to adjust for potential moderators through subgroup analyses and regression analysis.

## **Conclusions**

GLP-1RAs reduced SBP from 1.46 to 3.40 mmHg. DBP reduction from GLP-RAs was very minimal to none. Mean changes in weight, BMI and A1c directly drive the reduction in SBP. SBP reduction for semaglutide was more marked for patients on prolonged therapy, those with lower baseline mean SBP and for patients without DM. SBP reduction of liraglutide and dulaglutide were more pronounced among patients with a lower baseline mean SBP. Only exenatide reduced DBP with statistical significance, albeit the treatment effect was clinically modest. Further study is needed to elucidate the potential mechanisms of this blood pressure effects from GLP-1RA.

## **Perspectives**

GLP-1RAs, including semaglutide, liraglutide, exenatide, and dulaglutide, exhibit statistically significant but clinically modest efficacy in reducing SBP independently of glycemic control. Semaglutide leads with the greatest SBP reduction, influenced by factors such as weight, baseline SBP, and diabetes status. Liraglutide and dulaglutide also effectively lower SBP, while exenatide additionally impacts DBP. These findings suggest that GLP-1RAs present a promising approach for cardiovascular health management, warranting further investigation into their precise mechanisms. Their weight-independent effects, potential for personalized therapy, and emerging mechanistic insights pave the way for broader application in diverse patient populations, ultimately improving cardiovascular health across a wider range.

## **Novelty and relevance**

### ***What is new?***

- SBP reduction from the use of GLP-1RAs is significant, independent of its effects on glycemia.

- Semaglutide demonstrated superior SBP lowering with greater change in HbA1c and body mass index compared placebo but with less SBP lowering among patients with diabetes.
- DBP reduction was not observed among the GLP-1RA with the exception of a marginal decrease in DBP in patients taking exenatide.

### ***What is relevant?***

The class of GLP-1RA provide modest improvement in systolic blood pressure and may serve as a useful strategy for patients with overweight/obesity and hypertension.

### **Clinical/Pathophysiological implications?**

- Mechanisms resulting in the BP lowering effect remain unknown, and the clinical benefit resulting from BP reduction specifically from GLP-1RA require further investigation.
- Future research directions encompass investigating GLP-1RA-induced SBP reduction mechanisms through mechanistic studies, gene expression analysis, and advanced imaging; examining the impact of patient characteristics on response and conducting trials targeting specific subpopulations; assessing long-term effects and clinical outcomes through observational studies and RCTs; exploring novel GLP-1RA formulations and targets, including extended half-lives and additional receptors; and leveraging emerging technologies for personalized treatment strategies by integrating data from diverse sources.
- Addressing these areas promises a deeper understanding of GLP-1RAs in blood pressure control, enhancing cardiovascular outcomes in T2DM and associated conditions



**Statement of Ethics:** Ethics approval for this paper is not required because this study is based exclusively on published literature. Patient consent was not needed as this study was based on publicly available data.

**Conflict of Interest:** The authors declare that they have no conflicts of interest relevant to the content of this manuscript.

**Funding:** No specific financial support was obtained to prepare this article.

**Author Contributions:** **Frederick B. Rivera MD:** Conceptualization; Data curation; Formal analysis; Investigation; Methodology; Validation; Writing - original draft; Writing - review & editing; **John Paul Aparece, MD, Grace Nooriza O. Lumbang, MD; Danielle Rose Magno Gaid, MD, Linnaeus Louisse A. Cruz, MD:** Writing – Data curation; review & editing; **Grace Nooriza O. Lumbang, MD; Danielle Rose Magno Gaid, MD, Frederick B. Rivera MD and Linnaeus Louisse A. Cruz, MD:** Data Curation; Writing - original draft; Writing - review & editing; **John Vincent Magalong, MD:** Writing - original draft; Writing - review & editing; **John Vincent Magalong, MD and Nathan Ross B. Bantayan, BSc:** Data curation; Data

interpretation; Formal analysis; Writing - original draft; Writing - review & editing; **Frederick B. Rivera, MD**: Writing - original draft; Writing - review & editing; **Kyla M. Lara-Breitinger, MD**; **Martha Gulati, MD MS**; **George Bakris, MD**: Writing - review & editing.

**Data Availability Statement:** All data generated or analyzed during this study are included in this article. Further inquiries can be directed to the corresponding author.

## Reference:

1. ElSayed NA, Aleppo G, Aroda VR, Bannuru RR, Brown FM, Bruemmer D, et al. 9. Pharmacologic Approaches to Glycemic Treatment: Standards of Care in Diabetes-2023. *Diabetes Care*. 2023;46(Suppl 1):S140-s57.
2. Fu EL, Clase CM, Janse RJ, Lindholm B, Dekker FW, Jardine MJ, Carrero JJ. Comparative effectiveness of SGLT2i versus GLP1-RA on cardiovascular outcomes in routine clinical practice. *Int J Cardiol*. 2022;352:172-9.
3. Kosiborod MN, Abildstrøm SZ, Borlaug BA, Butler J, Rasmussen S, Davies M, et al. Semaglutide in Patients with Heart Failure with Preserved Ejection Fraction and Obesity. *N Engl J Med*. 2023;389(12):1069-84.
4. Lincoff AM, Brown-Frandsen K, Colhoun HM, Deanfield J, Emerson SS, Esbjerg S, et al. Semaglutide and Cardiovascular Outcomes in Obesity without Diabetes. *N Engl J Med*. 2023.
5. Michos ED, Lopez-Jimenez F, Gulati M. Role of Glucagon-Like Peptide-1 Receptor Agonists in Achieving Weight Loss and Improving Cardiovascular Outcomes in People With Overweight and Obesity. *J Am Heart Assoc*. 2023;12(11):e029282.
6. Winquist RJ, Gribkoff VK. Cardiovascular effects of GLP-1 receptor agonism. *Adv Pharmacol*. 2022;94:213-54.
7. Nauck MA, Meier JJ, Cavender MA, Abd El Aziz M, Drucker DJ. Cardiovascular Actions and Clinical Outcomes With Glucagon-Like Peptide-1 Receptor Agonists and Dipeptidyl Peptidase-4 Inhibitors. *Circulation*. 2017;136(9):849-70.
8. Helmstädter J, Keppeler K, Küster L, Münzel T, Daiber A, Steven S. Glucagon-like peptide-1 (GLP-1) receptor agonists and their cardiovascular benefits-The role of the GLP-1 receptor. *Br J Pharmacol*. 2022;179(4):659-76.
9. Andersen A, Lund A, Knop FK, Vilsbøll T. Glucagon-like peptide 1 in health and disease. *Nat Rev Endocrinol*. 2018;14(7):390-403.
10. Grieve DJ, Cassidy RS, Green BD. Emerging cardiovascular actions of the incretin hormone glucagon-like peptide-1: potential therapeutic benefits beyond glycaemic control? *Br J Pharmacol*. 2009;157(8):1340-51.
11. Ribeiro-Silva JC, Tavares CAM, Girardi ACC. The blood pressure lowering effects of glucagon-like peptide-1 receptor agonists: A mini-review of the potential mechanisms. *Curr Opin Pharmacol*. 2023;69:102355.
12. Robinson LE, Holt TA, Rees K, Randeva HS, O'Hare JP. Effects of exenatide and liraglutide on heart rate, blood pressure and body weight: systematic review and meta-analysis. *BMJ Open*. 2013;3(1).
13. Sun F, Wu S, Guo S, Yu K, Yang Z, Li L, et al. Impact of GLP-1 receptor agonists on blood pressure, heart rate and hypertension among patients with type 2 diabetes: A systematic review and network meta-analysis. *Diabetes Res Clin Pract*. 2015;110(1):26-37.
14. Zhao X, Huang K, Zheng M, Duan J. Effect of liraglutide on blood pressure: a meta-analysis of liraglutide randomized controlled trials. *BMC Endocr Disord*. 2019;19(1):4.
15. Wu W, Tong HM, Li YS, Cui J. The effect of semaglutide on blood pressure in patients with type-2 diabetes: a systematic review and meta-analysis. *Endocrine*. 2023.
16. Page MJ, McKenzie JE, Bossuyt PM, Boutron I, Hoffmann TC, Mulrow CD, et al. The PRISMA 2020 statement: an updated guideline for reporting systematic reviews. *Bmj*. 2021;372:n71.
17. Liberati A, Altman DG, Tetzlaff J, Mulrow C, Gøtzsche PC, Ioannidis JP, et al. The PRISMA statement for reporting systematic reviews and meta-analyses of studies that evaluate healthcare interventions: explanation and elaboration. *Bmj*. 2009;339:b2700.

18. Goldkuhle M, Guyatt GH, Kreuzberger N, Akl EA, Dahm P, van Dalen EC, et al. GRADE concept 4: rating the certainty of evidence when study interventions or comparators differ from PICO targets. *J Clin Epidemiol.* 2023;159:40-8.
19. Sideri S, Papageorgiou SN, Eliades T. Registration in the international prospective register of systematic reviews (PROSPERO) of systematic review protocols was associated with increased review quality. *J Clin Epidemiol.* 2018;100:103-10.
20. Jorsal A, Kistorp C, Holmager P, Tougaard RS, Nielsen R, Hänselmann A, et al. Effect of liraglutide, a glucagon-like peptide-1 analogue, on left ventricular function in stable chronic heart failure patients with and without diabetes (LIVE)-a multicentre, double-blind, randomised, placebo-controlled trial. *Eur J Heart Fail.* 2017;19(1):69-77.
21. Loganathan J, Cohen AC, Kaloupis GM, Harris C, Chronopoulos A, James V, et al. A pilot clinical study to Evaluate Liraglutide-mediated Anti-platelet activity in patients with type-2 Diabetes (ELAID study). *J Diabetes Complications.* 2022;36(5):108188.
22. Dejgaard TF, Frandsen CS, Hansen TS, Almdal T, Urhammer S, Pedersen-Bjergaard U, et al. Efficacy and safety of liraglutide for overweight adult patients with type 1 diabetes and insufficient glycaemic control (Lira-1): a randomised, double-blind, placebo-controlled trial. *Lancet Diabetes Endocrinol.* 2016;4(3):221-32.
23. Dejgaard TF, Schmidt S, Frandsen CS, Vistisen D, Madsbad S, Andersen HU, Nørgaard K. Liraglutide reduces hyperglycaemia and body weight in overweight, dysregulated insulin-pump-treated patients with type 1 diabetes: The Lira Pump trial-a randomized, double-blinded, placebo-controlled trial. *Diabetes Obes Metab.* 2020;22(4):492-500.
24. de Wit HM, Vervoort GM, Jansen HJ, de Grauw WJ, de Galan BE, Tack CJ. Liraglutide reverses pronounced insulin-associated weight gain, improves glycaemic control and decreases insulin dose in patients with type 2 diabetes: a 26 week, randomised clinical trial (ELEGANT). *Diabetologia.* 2014;57(9):1812-9.
25. Mok J, Adeleke MO, Brown A, Magee CG, Firman C, Makahamadze C, et al. Safety and Efficacy of Liraglutide, 3.0 mg, Once Daily vs Placebo in Patients With Poor Weight Loss Following Metabolic Surgery: The BARI-OPTIMISE Randomized Clinical Trial. *JAMA Surg.* 2023;158(10):1003-11.
26. Lind M, Hirsch IB, Tuomilehto J, Dahlqvist S, Ahrén B, Torffvit O, et al. Liraglutide in people treated for type 2 diabetes with multiple daily insulin injections: randomised clinical trial (MDI Liraglutide trial). *BMJ.* 2015;351:h5364.
27. Armstrong MJ, Barton D, Gaunt P, Hull D, Guo K, Stocken D, et al. Liraglutide efficacy and action in non-alcoholic steatohepatitis (LEAN): study protocol for a phase II multicentre, double-blinded, randomised, controlled trial. *BMJ Open.* 2013;3(11):e003995.
28. Astrup A, Rössner S, Van Gaal L, Rissanen A, Niskanen L, Al Hakim M, et al. Effects of liraglutide in the treatment of obesity: a randomised, double-blind, placebo-controlled study. *Lancet.* 2009;374(9701):1606-16.
29. Bojer AS, Sørensen MH, Bjerre J, Gaede P, Vejlstrup N, Madsen PL. Metabolic improvement with short-term, glucagon-like peptide-1 receptor agonist treatment does not improve cardiac diastolic dysfunction in patients with type 2 diabetes: A randomized, double-blind, placebo-controlled trial. *Diabetes Obes Metab.* 2021;23(10):2374-84.
30. Chen WR, Hu SY, Chen YD, Zhang Y, Qian G, Wang J, et al. Effects of liraglutide on left ventricular function in patients with ST-segment elevation myocardial infarction undergoing primary percutaneous coronary intervention. *Am Heart J.* 2015;170(5):845-54.
31. Faber R, Zander M, Pena A, Michelsen MM, Mygind ND, Prescott E. Effect of the glucagon-like peptide-1 analogue liraglutide on coronary microvascular function in patients with type 2 diabetes - a randomized, single-blinded, cross-over pilot study. *Cardiovasc Diabetol.* 2015;14:41.

32. Ghanim H, Batra M, Green K, Abuaysheh S, Hejna J, Makdissi A, et al. Liraglutide treatment in overweight and obese patients with type 1 diabetes: A 26-week randomized controlled trial; mechanisms of weight loss. *Diabetes Obes Metab.* 2020;22(10):1742-52.
33. Idorn T, Knop FK, Jørgensen MB, Jensen T, Resuli M, Hansen PM, et al. Safety and Efficacy of Liraglutide in Patients With Type 2 Diabetes and End-Stage Renal Disease: An Investigator-Initiated, Placebo-Controlled, Double-Blind, Parallel-Group, Randomized Trial. *Diabetes Care.* 2016;39(2):206-13.
34. Kim SH, Abbasi F, Lamendola C, Liu A, Ariel D, Schaaf P, et al. Benefits of liraglutide treatment in overweight and obese older individuals with prediabetes. *Diabetes Care.* 2013;36(10):3276-82.
35. Kuhadiya ND, Dhindsa S, Ghanim H, Mehta A, Makdissi A, Batra M, et al. Addition of Liraglutide to Insulin in Patients With Type 1 Diabetes: A Randomized Placebo-Controlled Clinical Trial of 12 Weeks. *Diabetes Care.* 2016;39(6):1027-35.
36. Kumarathurai P, Anholm C, Nielsen OW, Kristiansen OP, Mølvi J, Madsbad S, et al. Effects of the glucagon-like peptide-1 receptor agonist liraglutide on systolic function in patients with coronary artery disease and type 2 diabetes: a randomized double-blind placebo-controlled crossover study. *Cardiovasc Diabetol.* 2016;15(1):105.
37. Kumarathurai P, Anholm C, Fabricius-Bjerre A, Nielsen OW, Kristiansen O, Madsbad S, et al. Effects of the glucagon-like peptide-1 receptor agonist liraglutide on 24-h ambulatory blood pressure in patients with type 2 diabetes and stable coronary artery disease: a randomized, double-blind, placebo-controlled, crossover study. *J Hypertens.* 2017;35(5):1070-8.
38. Kumarathurai P, Sajadieh A, Anholm C, Kristiansen OP, Haugaard SB, Nielsen OW. Effects of liraglutide on diastolic function parameters in patients with type 2 diabetes and coronary artery disease: a randomized crossover study. *Cardiovasc Diabetol.* 2021;20(1):12.
39. Larsen JR, Vedtofte L, Jakobsen MSL, Jespersen HR, Jakobsen MI, Svensson CK, et al. Effect of Liraglutide Treatment on Prediabetes and Overweight or Obesity in Clozapine- or Olanzapine-Treated Patients With Schizophrenia Spectrum Disorder: A Randomized Clinical Trial. *JAMA Psychiatry.* 2017;74(7):719-28.
40. le Roux CW, Astrup A, Fujioka K, Greenway F, Lau DCW, Van Gaal L, et al. 3 years of liraglutide versus placebo for type 2 diabetes risk reduction and weight management in individuals with prediabetes: a randomised, double-blind trial. *Lancet.* 2017;389(10077):1399-409.
41. Liakos A, Lambadiari V, Bargiota A, Kitsios K, Avramidis I, Kotsa K, et al. Effect of liraglutide on ambulatory blood pressure in patients with hypertension and type 2 diabetes: A randomized, double-blind, placebo-controlled trial. *Diabetes Obes Metab.* 2019;21(3):517-24.
42. Lundgren JR, Janus C, Jensen SBK, Juhl CR, Olsen LM, Christensen RM, et al. Healthy Weight Loss Maintenance with Exercise, Liraglutide, or Both Combined. *N Engl J Med.* 2021;384(18):1719-30.
43. Matikainen N, Söderlund S, Björnson E, Pietiläinen K, Hakkarainen A, Lundbom N, et al. Liraglutide treatment improves postprandial lipid metabolism and cardiometabolic risk factors in humans with adequately controlled type 2 diabetes: A single-centre randomized controlled study. *Diabetes Obes Metab.* 2019;21(1):84-94.
44. Mensberg P, Nyby S, Jørgensen PG, Storgaard H, Jensen MT, Sivertsen J, et al. Near-normalization of glycaemic control with glucagon-like peptide-1 receptor agonist treatment combined with exercise in patients with type 2 diabetes. *Diabetes Obes Metab.* 2017;19(2):172-80.
45. Pi-Sunyer X, Astrup A, Fujioka K, Greenway F, Halpern A, Krempf M, et al. A Randomized, Controlled Trial of 3.0 mg of Liraglutide in Weight Management. *N Engl J Med.* 2015;373(1):11-22.
46. Sandsdal RM, Juhl CR, Jensen SBK, Lundgren JR, Janus C, Blond MB, et al. Combination of exercise and GLP-1 receptor agonist treatment reduces severity of metabolic

syndrome, abdominal obesity, and inflammation: a randomized controlled trial. *Cardiovasc Diabetol.* 2023;22(1):41.

47. Smits MM, Tonneijck L, Muskiet MH, Hoekstra T, Kramer MH, Diamant M, van Raalte DH. Heart rate acceleration with GLP-1 receptor agonists in type 2 diabetes patients: an acute and 12-week randomised, double-blind, placebo-controlled trial. *Eur J Endocrinol.* 2017;176(1):77-86.
48. Wadden TA, Walsh OA, Berkowitz RI, Chao AM, Alamuddin N, Gruber K, et al. Intensive Behavioral Therapy for Obesity Combined with Liraglutide 3.0 mg: A Randomized Controlled Trial. *Obesity (Silver Spring).* 2019;27(1):75-86.
49. Whicher CA, Price HC, Phiri P, Rathod S, Barnard-Kelly K, Ngianga K, et al. The use of liraglutide 3.0 mg daily in the management of overweight and obesity in people with schizophrenia, schizoaffective disorder and first episode psychosis: Results of a pilot randomized, double-blind, placebo-controlled trial. *Diabetes Obes Metab.* 2021;23(6):1262-71.
50. Kadowaki T, Isendahl J, Khalid U, Lee SY, Nishida T, Ogawa W, et al. Semaglutide once a week in adults with overweight or obesity, with or without type 2 diabetes in an east Asian population (STEP 6): a randomised, double-blind, double-dummy, placebo-controlled, phase 3a trial. *Lancet Diabetes Endocrinol.* 2022;10(3):193-206.
51. Davies M, Færch L, Jeppesen OK, Pakseresht A, Pedersen SD, Perreault L, et al. Semaglutide 2.4 mg once a week in adults with overweight or obesity, and type 2 diabetes (STEP 2): a randomised, double-blind, double-dummy, placebo-controlled, phase 3 trial. *Lancet.* 2021;397(10278):971-84.
52. Rubino D, Abrahamsson N, Davies M, Hesse D, Greenway FL, Jensen C, et al. Effect of Continued Weekly Subcutaneous Semaglutide vs Placebo on Weight Loss Maintenance in Adults With Overweight or Obesity: The STEP 4 Randomized Clinical Trial. *JAMA.* 2021;325(14):1414-25.
53. Garvey WT, Batterham RL, Bhatta M, Buscemi S, Christensen LN, Frias JP, et al. Two-year effects of semaglutide in adults with overweight or obesity: the STEP 5 trial. *Nat Med.* 2022;28(10):2083-91.
54. Knop FK, Aroda VR, do Vale RD, Holst-Hansen T, Laursen PN, Rosenstock J, et al. Oral semaglutide 50 mg taken once per day in adults with overweight or obesity (OASIS 1): a randomised, double-blind, placebo-controlled, phase 3 trial. *Lancet.* 2023;402(10403):705-19.
55. Mosenzon O, Blicher TM, Rosenlund S, Eriksson JW, Heller S, Hels OH, et al. Efficacy and safety of oral semaglutide in patients with type 2 diabetes and moderate renal impairment (PIONEER 5): a placebo-controlled, randomised, phase 3a trial. *Lancet Diabetes Endocrinol.* 2019;7(7):515-27.
56. Husain M, Birkenfeld AL, Donsmark M, Dungan K, Eliaschewitz FG, Franco DR, et al. Oral Semaglutide and Cardiovascular Outcomes in Patients with Type 2 Diabetes. *N Engl J Med.* 2019;381(9):841-51.
57. Sorli C, Harashima SI, Tsoukas GM, Unger J, Karsbøl JD, Hansen T, Bain SC. Efficacy and safety of once-weekly semaglutide monotherapy versus placebo in patients with type 2 diabetes (SUSTAIN 1): a double-blind, randomised, placebo-controlled, parallel-group, multinational, multicentre phase 3a trial. *Lancet Diabetes Endocrinol.* 2017;5(4):251-60.
58. Rodbard HW, Lingvay I, Reed J, de la Rosa R, Rose L, Sugimoto D, et al. Semaglutide Added to Basal Insulin in Type 2 Diabetes (SUSTAIN 5): A Randomized, Controlled Trial. *J Clin Endocrinol Metab.* 2018;103(6):2291-301.
59. Davies M, Pieber TR, Hartoft-Nielsen ML, Hansen OKH, Jabbour S, Rosenstock J. Effect of Oral Semaglutide Compared With Placebo and Subcutaneous Semaglutide on Glycemic Control in Patients With Type 2 Diabetes: A Randomized Clinical Trial. *JAMA.* 2017;318(15):1460-70.
60. Lingvay I, Desouza CV, Lalic KS, Rose L, Hansen T, Zacho J, Pieber TR. A 26-Week Randomized Controlled Trial of Semaglutide Once Daily Versus Liraglutide and Placebo in



Patients With Type 2 Diabetes Suboptimally Controlled on Diet and Exercise With or Without Metformin. *Diabetes Care*. 2018;41(9):1926-37.

61. O'Neil PM, Birkenfeld AL, McGowan B, Mosenzon O, Pedersen SD, Wharton S, et al. Efficacy and safety of semaglutide compared with liraglutide and placebo for weight loss in patients with obesity: a randomised, double-blind, placebo and active controlled, dose-ranging, phase 2 trial. *Lancet*. 2018;392(10148):637-49.
62. Gullaksen S, Vernstrøm L, Sørensen SS, Ringgaard S, Laustsen C, Funck KL, et al. Separate and combined effects of semaglutide and empagliflozin on kidney oxygenation and perfusion in people with type 2 diabetes: a randomised trial. *Diabetologia*. 2023;66(5):813-25.
63. Wilding JPH, Batterham RL, Calanna S, Davies M, Van Gaal LF, Lingvay I, et al. Once-Weekly Semaglutide in Adults with Overweight or Obesity. *N Engl J Med*. 2021;384(11):989-1002.
64. Dungan KM, Weitgasser R, Perez Manghi F, Pintilei E, Fahrbach JL, Jiang HH, et al. A 24-week study to evaluate the efficacy and safety of once-weekly dulaglutide added on to glimepiride in type 2 diabetes (AWARD-8). *Diabetes Obes Metab*. 2016;18(5):475-82.
65. Gerstein HC, Colhoun HM, Dagenais GR, Diaz R, Lakshmanan M, Pais P, et al. Dulaglutide and cardiovascular outcomes in type 2 diabetes (REWIND): a double-blind, randomised placebo-controlled trial. *Lancet*. 2019;394(10193):121-30.
66. Ferdinand KC, White WB, Calhoun DA, Lonn EM, Sager PT, Brunelle R, et al. Effects of the once-weekly glucagon-like peptide-1 receptor agonist dulaglutide on ambulatory blood pressure and heart rate in patients with type 2 diabetes mellitus. *Hypertension*. 2014;64(4):731-7.
67. Grunberger G, Chang A, Garcia Soria G, Botros FT, Bsharat R, Milicevic Z. Monotherapy with the once-weekly GLP-1 analogue dulaglutide for 12 weeks in patients with Type 2 diabetes: dose-dependent effects on glycaemic control in a randomized, double-blind, placebo-controlled study. *Diabet Med*. 2012;29(10):1260-7.
68. Miyagawa J, Odawara M, Takamura T, Iwamoto N, Takita Y, Imaoka T. Once-weekly glucagon-like peptide-1 receptor agonist dulaglutide is non-inferior to once-daily liraglutide and superior to placebo in Japanese patients with type 2 diabetes: a 26-week randomized phase III study. *Diabetes Obes Metab*. 2015;17(10):974-83.
69. Apovian CM, Bergenstal RM, Cuddihy RM, Qu Y, Lenox S, Lewis MS, Glass LC. Effects of exenatide combined with lifestyle modification in patients with type 2 diabetes. *Am J Med*. 2010;123(5):468.e9-17.
70. Buse JB, Bergenstal RM, Glass LC, Heilmann CR, Lewis MS, Kwan AY, et al. Use of twice-daily exenatide in Basal insulin-treated patients with type 2 diabetes: a randomized, controlled trial. *Ann Intern Med*. 2011;154(2):103-12.
71. Dushay J, Gao C, Gopalakrishnan GS, Crawley M, Mitten EK, Wilker E, et al. Short-term exenatide treatment leads to significant weight loss in a subset of obese women without diabetes. *Diabetes Care*. 2012;35(1):4-11.
72. Gill A, Hoogwerf BJ, Burger J, Bruce S, Macconell L, Yan P, et al. Effect of exenatide on heart rate and blood pressure in subjects with type 2 diabetes mellitus: a double-blind, placebo-controlled, randomized pilot study. *Cardiovasc Diabetol*. 2010;9:6.
73. Klausen MK, Jensen ME, Møller M, Le Dous N, Jensen A, Zeeman VA, et al. Exenatide once weekly for alcohol use disorder investigated in a randomized, placebo-controlled clinical trial. *JCI Insight*. 2022;7(19).
74. Liutkus J, Rosas Guzman J, Norwood P, Pop L, Northrup J, Cao D, Trautmann M. A placebo-controlled trial of exenatide twice-daily added to thiazolidinediones alone or in combination with metformin. *Diabetes Obes Metab*. 2010;12(12):1058-65.
75. Lundkvist P, Pereira MJ, Katsogiannos P, Sjöström CD, Johnsson E, Eriksson JW. Dapagliflozin once daily plus exenatide once weekly in obese adults without diabetes: Sustained

reductions in body weight, glycaemia and blood pressure over 1 year. *Diabetes Obes Metab.* 2017;19(9):1276-88.

76. Moretto TJ, Milton DR, Ridge TD, Macconell LA, Okerson T, Wolka AM, Brodows RG. Efficacy and tolerability of exenatide monotherapy over 24 weeks in antidiabetic drug-naïve patients with type 2 diabetes: a randomized, double-blind, placebo-controlled, parallel-group study. *Clin Ther.* 2008;30(8):1448-60.

77. Guja C, Frías JP, Somogyi A, Jabbour S, Wang H, Hardy E, Rosenstock J. Effect of exenatide QW or placebo, both added to titrated insulin glargine, in uncontrolled type 2 diabetes: The DURATION-7 randomized study. *Diabetes Obes Metab.* 2018;20(7):1602-14.

78. Gadde KM, Vetter ML, Iqbal N, Hardy E, Öhman P, investigators D-N-s. Efficacy and safety of autoinjected exenatide once-weekly suspension versus sitagliptin or placebo with metformin in patients with type 2 diabetes: The DURATION-NEO-2 randomized clinical study. *Diabetes Obes Metab.* 2017;19(7):979-88.

79. Siskind DJ, Russell AW, Gamble C, Winckel K, Mayfield K, Hollingworth S, et al. Treatment of clozapine-associated obesity and diabetes with exenatide in adults with schizophrenia: A randomized controlled trial (CODEX). *Diabetes Obes Metab.* 2018;20(4):1050-5.

80. Rosenstock J, Buse JB, Azeem R, Prabhakar P, Kjems L, Huang H, Baron MA. Efficacy and Safety of ITCA 650, a Novel Drug-Device GLP-1 Receptor Agonist, in Type 2 Diabetes Uncontrolled With Oral Antidiabetes Drugs: The FREEDOM-1 Trial. *Diabetes Care.* 2018;41(2):333-40.

81. Davies MJ, Bergenstal R, Bode B, Kushner RF, Lewin A, Skjøth TV, et al. Efficacy of Liraglutide for Weight Loss Among Patients With Type 2 Diabetes: The SCALE Diabetes Randomized Clinical Trial. *JAMA.* 2015;314(7):687-99.

82. Gerstein HC, Colhoun HM, Dagenais GR, Diaz R, Lakshmanan M, Pais P, et al. Dulaglutide and renal outcomes in type 2 diabetes: an exploratory analysis of the REWIND randomised, placebo-controlled trial. *Lancet.* 2019;394(10193):131-8.

83. Chen WR, Shen XQ, Zhang Y, Chen YD, Hu SY, Qian G, et al. Effects of liraglutide on left ventricular function in patients with non-ST-segment elevation myocardial infarction. *Endocrine.* 2016;52(3):516-26.

84. Kannapiran M, Nisha D, Madhusudhana Rao A. Underestimation of impaired kidney function with serum creatinine. *Indian J Clin Biochem.* 2010;25(4):380-4.

85. Kennedy C, Hayes P, Salama S, Hennessy M, Fogacci F. The Effect of Semaglutide on Blood Pressure in Patients without Diabetes: A Systematic Review and Meta-Analysis. *J Clin Med.* 2023;12(3).

86. Fonseca VA, Devries JH, Henry RR, Donsmark M, Thomsen HF, Plutzky J. Reductions in systolic blood pressure with liraglutide in patients with type 2 diabetes: insights from a patient-level pooled analysis of six randomized clinical trials. *J Diabetes Complications.* 2014;28(3):399-405.

87. Wijkman MO, Dena M, Dahlqvist S, Sofizadeh S, Hirsch I, Tuomilehto J, et al. Predictors and correlates of systolic blood pressure reduction with liraglutide treatment in patients with type 2 diabetes. *J Clin Hypertens (Greenwich).* 2019;21(1):105-15.

88. Ferdinand KC, Dunn J, Nicolay C, Sam F, Blue EK, Wang H. Weight-dependent and weight-independent effects of dulaglutide on blood pressure in patients with type 2 diabetes. *Cardiovasc Diabetol.* 2023;22(1):49.

89. Wang B, Zhong J, Lin H, Zhao Z, Yan Z, He H, et al. Blood pressure-lowering effects of GLP-1 receptor agonists exenatide and liraglutide: a meta-analysis of clinical trials. *Diabetes Obes Metab.* 2013;15(8):737-49.

90. van Ruiten CC, Smits MM, Kok MD, Serné EH, van Raalte DH, Kramer MHH, et al. Mechanisms underlying the blood pressure lowering effects of dapagliflozin, exenatide, and



their combination in people with type 2 diabetes: a secondary analysis of a randomized trial. *Cardiovasc Diabetol.* 2022;21(1):63.

91. Sun F, Wu S, Chai S, Yang Z, Yu K, Zhan S. Impact of Glp-1RA on Heart Rate, Blood Pressure and Hypertension Among Type 2 Diabetes: A Systematic Review and Network Meta-Analysis. *Value Health.* 2014;17(7):A719-20.

92. Hu M, Cai X, Yang W, Zhang S, Nie L, Ji L. Effect of Hemoglobin A1c Reduction or Weight Reduction on Blood Pressure in Glucagon-Like Peptide-1 Receptor Agonist and Sodium-Glucose Cotransporter-2 Inhibitor Treatment in Type 2 Diabetes Mellitus: A Meta-Analysis. *J Am Heart Assoc.* 2020;9(7):e015323.

93. Martins FL, Bailey MA, Girardi ACC. Endogenous Activation of Glucagon-Like Peptide-1 Receptor Contributes to Blood Pressure Control: Role of Proximal Tubule Na. *Hypertension.* 2020;76(3):839-48.

94. Lundgren JR, Færch K, Witte DR, Jonsson AE, Pedersen O, Hansen T, et al. Greater glucagon-like peptide-1 responses to oral glucose are associated with lower central and peripheral blood pressures. *Cardiovasc Diabetol.* 2019;18(1):130.

95. Lambadiari V, Pavlidis G, Kousathana F, Varoudi M, Vlastos D, Maratou E, et al. Effects of 6-month treatment with the glucagon like peptide-1 analogue liraglutide on arterial stiffness, left ventricular myocardial deformation and oxidative stress in subjects with newly diagnosed type 2 diabetes. *Cardiovasc Diabetol.* 2018;17(1):8.

96. Shyangdan DS, Royle P, Clar C, Sharma P, Waugh N, Snaith A. Glucagon-like peptide analogues for type 2 diabetes mellitus. *Cochrane Database Syst Rev.* 2011;2011(10):CD006423.

97. Vilsbøll T, Christensen M, Junker AE, Knop FK, Gluud LL. Effects of glucagon-like peptide-1 receptor agonists on weight loss: systematic review and meta-analyses of randomised controlled trials. *BMJ.* 2012;344:d7771.

98. Whelton PK, Carey RM, Aronow WS, Casey DE, Collins KJ, Dennison Himmelfarb C, et al. 2017 ACC/AHA/AAPA/ABC/ACPM/AGS/APhA/ASH/ASPC/NMA/PCNA Guideline for the Prevention, Detection, Evaluation, and Management of High Blood Pressure in Adults: Executive Summary: A Report of the American College of Cardiology/American Heart Association Task Force on Clinical Practice Guidelines. *Hypertension.* 2018;71(6):1269-324.

99. Nauck MA, Quast DR, Wefers J, Meier JJ. GLP-1 receptor agonists in the treatment of type 2 diabetes - state-of-the-art. *Mol Metab.* 2021;46:101102.

**Table 1:** Characteristics of included studies

| Author (year) /<br>Name of Trial                                            | Phase   | Population                                                                                                 | No. of<br>patients | Age, years<br>(mean) | Female, n<br>(%) | Drug (dose and<br>frequency)          | Comparator                | Duration of<br>treatment (weeks) | Primary endpoint                                                                                |
|-----------------------------------------------------------------------------|---------|------------------------------------------------------------------------------------------------------------|--------------------|----------------------|------------------|---------------------------------------|---------------------------|----------------------------------|-------------------------------------------------------------------------------------------------|
| <b>Jorsal et al.<br/>(2016) / LIVE<br/>Trial<sup>20</sup></b>               | Phase 2 | Patients with or without<br>diabetes who had CHF, an<br>LVEF $\leq$ 45% and NYHA<br>functional class I–III | 241                | 65                   | 26 (10.8)        | Liraglutide (1.8 mg<br>OD)            | Placebo                   | 24 weeks                         | Change in LVEF                                                                                  |
| <b>Loganathan et<br/>al. (2022) /<br/>ELAID Trial<sup>21</sup></b>          | Phase 4 | Patients with T2DM and<br>without concurrent<br>antiplatelet therapy                                       | 16                 | 60                   | 6 (37.5)         | Liraglutide (1.8 mg<br>OD)            | Placebo                   | 26 weeks                         | Change in maximum slope<br>of platelet aggregation                                              |
| <b>Kadowaki et al<br/>(2022) / STEP 6<br/>Trial<sup>51</sup></b>            | Phase 3 | Adults with at least one self-<br>reported unsuccessful<br>dietary attempt to lose body<br>weight          | 401                | 51                   | 148<br>(36.9)    | Semaglutide (2.4 mg<br>and 1.7 mg QW) | Placebo                   | 68 weeks                         | Change in BW and<br>proportion of subjects<br>achieving at least 5%<br>reduction of baseline BW |
| <b>Davies et al.<br/>(2021) / STEP 2<br/>Trial<sup>52</sup></b>             | Phase 3 | Adults with T2DM and with<br>at least one unsuccessful<br>dietary effort to lose weight                    | 807                | 55                   | 413<br>(51.2)    | Semaglutide (2.4 mg<br>QW)            | Placebo                   | 68 weeks                         | Percentage change in BW<br>from baseline and loss of at<br>least 5% of baseline BW              |
| <b>Gadde et al.<br/>(2017) /<br/>DURATION-<br/>NEO-2 Trial<sup>78</sup></b> | Phase 3 | Adults with T2DM on a<br>stable regimen of metformin                                                       | 364                | 54                   | 172<br>(47.3)    | Exenatide (2.0 mg<br>QW)              | Sitagliptin or<br>Placebo | 28 weeks                         | Change in HbA1c                                                                                 |
| <b>Knop et al.<br/>(2023) / OASIS<br/>1 Trial<sup>55</sup></b>              | Phase 3 | Obese adults with at least<br>one self-reported dietary<br>weight loss effort                              | 667                | 50                   | 485<br>(72.7)    | Semaglutide (50 mg<br>OD)             | Placebo                   | 68 weeks                         | Percentage change in BW<br>and whether participants<br>reached at least 5% BW<br>reduction      |

|                                                               |          |                                                                                                         |       |    |              |                                                                         |                                          |                                                  |                                                                    |
|---------------------------------------------------------------|----------|---------------------------------------------------------------------------------------------------------|-------|----|--------------|-------------------------------------------------------------------------|------------------------------------------|--------------------------------------------------|--------------------------------------------------------------------|
| <b>Siskind et al. (2017) / CODEX Trial</b> <sup>79</sup>      | Phase 2  | Adults with a clinical diagnosis of schizophrenia or schizoaffective disorder taking oral clozapine     | 28    | -  | 10 (35.7)    | Exenatide (2 mg QW)                                                     | Usual care (Clozapine alone)             | 24 weeks                                         | Difference in the proportion of participants with >5% BW reduction |
| <b>Moretto et al. (2008)</b> <sup>76</sup>                    | Phase 2  | Overweight or obese adults with T2DM                                                                    | 232   | 54 | 102 (44.0)   | Exenatide (5 ug or 10 ug BID)                                           | Placebo                                  | 24 weeks                                         | Change in HbA1c                                                    |
| <b>Lingvay et al. (2018)</b> <sup>60</sup>                    | Phase 2  | Adults with T2DM and on stable diabetes treatment                                                       | 705   | 57 | 326 (46.2)   | Semaglutide (0.05, 0.1, 0.2 or 0.3 mg OD)                               | Liraglutide or Placebo                   | 26 weeks                                         | Change in HbA1c                                                    |
| <b>Dungan et al. (2016) / AWARD-8 Trial</b> <sup>64</sup>     | Phase 3  | Adults with a BMI of $\leq 45$ kg/m2 with T2DM not optimally controlled with diet and exercise          | 300   | 58 | 167 (55.7)   | Dulaglutide (1.5 mg QW)                                                 | Placebo                                  | 24 weeks                                         | Change in HbA1c                                                    |
| <b>Dejgaard et al. (2019) / Lira Pump Trial</b> <sup>23</sup> | Phase 3  | Adults with T1DM, treated with CSII, in non-optimal glycemic control                                    | 44    | 50 | 30 (68.2)    | Liraglutide (1.8 mg OD)                                                 | Placebo                                  | 26 weeks                                         | Change in HbA1c                                                    |
| <b>Gerstein et al. (2019) / REWIND Trial</b> <sup>65</sup>    | Phase 3  | Adults with T2DM whose HbA1c was 9.5% or less, on stable doses of up to two oral glucose-lowering drugs | 9,901 | 66 | 4,589 (46.3) | Dulaglutide (1.5 mg QW)                                                 | Placebo                                  | Treatment period is not uniform for all subjects | MACE                                                               |
| <b>O'Neil et al. (2018)</b> <sup>61</sup>                     | Phase 2  | Obese adults without diabetes                                                                           | 957   | 47 | 619 (64.7)   | Semaglutide (0.05, 0.1, 0.2, 0.3 or 0.4 mg OD) or Liraglutide (3 mg OD) | Placebo and active control (Liraglutide) | 52 weeks                                         | Percentage weight loss                                             |
| <b>Lundkvist et al. (2017)</b> <sup>75</sup>                  | Phase 2a | Obese adults without diabetes                                                                           | 50    | 53 | 30 (60.0)    | Exenatide (2 mg QW)                                                     | Placebo                                  | 52 weeks                                         | Change and percent change in BW                                    |

|                                                               |          |                                                                                                                    |        |    |               |                                   |         |           |                                                                                                    |
|---------------------------------------------------------------|----------|--------------------------------------------------------------------------------------------------------------------|--------|----|---------------|-----------------------------------|---------|-----------|----------------------------------------------------------------------------------------------------|
| <b>Mosenzon et al. (2019) / PIONEER 5 Trial</b> <sup>56</sup> | Phase 3a | Adults with T2DM and an eGFR of 30–59 mL/min per 1.73 m <sup>2</sup>                                               | 324    | 70 | 168 (51.9)    | Semaglutide (14 mg OD)            | Placebo | 26 weeks  | Change in HbA1c                                                                                    |
| <b>Wilding et al. (2021)</b> <sup>63</sup>                    | Phase 3  | Adults with one or more self-reported unsuccessful dietary efforts to lose weight                                  | 1,961  | 46 | 1,453 (74.1)  | Semaglutide (2.4 mg QW)           | Placebo | 68 weeks  | Percentage change in BW and weight reduction of at least 5%                                        |
| <b>Lincoff et al. (2023) / SELECT Trial</b> <sup>4</sup>      | Phase 4  | Overweight or obese patients who had preexisting cardiovascular disease but had no history of diabetes             | 17,604 | 62 | 12,732 (72.3) | Semaglutide (2.4 mg QW)           | Placebo | 136 weeks | Composite of death from cardiovascular causes, nonfatal myocardial infarction, or non-fatal stroke |
| <b>Husain et al. (2019) / PIONEER 6 Trial</b> <sup>57</sup>   | Phase 3  | Patients with established cardiovascular disease or chronic kidney disease                                         | 3,183  | 66 | 1,007 (31.6)  | Semaglutide (14 mg OD)            | Placebo | 69 weeks  | MACE                                                                                               |
| <b>Gill et al. (2010)</b> <sup>72</sup>                       | Phase 2  | Adults on a stable metformin dose for 30 days or on TZD for 120 days                                               | 54     | 57 | 24 (44.4)     | Exenatide (10 µg BID)             | Placebo | 12 weeks  | Change in mean 24-hour HR                                                                          |
| <b>Ghanim et. al (2020)</b> <sup>32</sup>                     | Phase 3  | Overweight or obese adults with T1DM, on stable basal and bolus insulin, and had no detectable C-peptide in plasma | 84     | 47 | 60 (71.4)     | Liraglutide (1.8 mg OD)           | Placebo | 26 weeks  | Change in HbA1c                                                                                    |
| <b>Sorli et al. (2017) / SUSTAIN 1 Trial</b> <sup>58</sup>    | Phase 3a | Adults with T2DM treated with only diet and exercise alone                                                         | 387    | 54 | 177 (45.7)    | Semaglutide (0.5 mg or 1.0 mg QW) | Placebo | 30 weeks  | Change in HbA1c                                                                                    |

|                                                          |          |                                                                                                         |       |    |              |                                            |                           |           |                                                                                       |
|----------------------------------------------------------|----------|---------------------------------------------------------------------------------------------------------|-------|----|--------------|--------------------------------------------|---------------------------|-----------|---------------------------------------------------------------------------------------|
| <b>le Roux et al. (2017)</b> <sup>40</sup>               | Phase 3a | Obese adults with stable bodyweight, with dyslipidemia or hypertension, or both                         | 2,254 | 48 | 1,714 (76.0) | Liraglutide (3.0 mg OD)                    | Placebo                   | 160 weeks | Proportion of individuals with type 2 diabetes at 160 weeks                           |
| <b>Davies et al. (2017)</b> <sup>50</sup>                | Phase 2  | Adults with T2DM and insufficient glycemic control                                                      | 632   | 57 | 395 (62.5)   | Semaglutide (2.5, 5, 10, 20, and 40 mg OD) | Placebo or SC Semaglutide | 26 weeks  | Change in HbA1c                                                                       |
| <b>Smits et al. (2017)</b> <sup>47</sup>                 | Phase 3  | Patients with T2DM                                                                                      | 36    | 61 | 9 (25.0)     | Liraglutide (1.8 mg OD)                    | Placebo                   | 12 weeks  | Change in LF/HF ratio                                                                 |
| <b>Idorn et al. (2016)</b> <sup>33</sup>                 | Phase 2  | Adults with T2DM and ESRD                                                                               | 23    | 66 | 8 (34.8)     | Liraglutide (0.6 mg OD)                    | Placebo                   | 12 weeks  | Dose-corrected trough concentration of liraglutide in plasma at the final trial visit |
| <b>Rubino et al. (2021) / STEP 4 Trial</b> <sup>53</sup> | Phase 3a | Adults with at least one self-reported unsuccessful dietary effort to lose weight                       | 803   | 46 | 634 (79.0)   | Semaglutide (2.4 mg QW)                    | Placebo                   | 68 weeks  | Percent change in BW                                                                  |
| <b>Grunberger et al. (2012)</b> <sup>67</sup>            | Phase 2  | Adults with T2DM who were anti-hyperglycemic medication-naïve or had discontinued metformin monotherapy | 167   | 57 | 90 (54.9)    | Dulaglutide (0.1, 0.5, 1.0 or 1.5 mg QW)   | Placebo                   | 12 weeks  | Change in HbA1c                                                                       |
| <b>Kim et al. (2013)</b> <sup>34</sup>                   | Phase 3  | Adults with prediabetes                                                                                 | 51    | 58 | 33 (64.7)    | Liraglutide (1.8 mg OD)                    | Placebo                   | 14 weeks  | Percentage loss of baseline BW and change in insulin resistance                       |
| <b>Kumarathurai et al. (2017)</b> <sup>37</sup>          | Phase 3  | Overweight patients with T2DM and stable CAD                                                            | 24    | 63 | 22 (91.7)    | Liraglutide (1.8 mg OD)                    | Placebo                   | 12 weeks  | Change in mean 24-hour SBP and DBP                                                    |

|                                                              |         |                                                                                                                                                                                                                                                                                                                                                                                                                    |     |    |            |                                  |                                                         |          |                                                                                                        |
|--------------------------------------------------------------|---------|--------------------------------------------------------------------------------------------------------------------------------------------------------------------------------------------------------------------------------------------------------------------------------------------------------------------------------------------------------------------------------------------------------------------|-----|----|------------|----------------------------------|---------------------------------------------------------|----------|--------------------------------------------------------------------------------------------------------|
| <b>Kosiborod et al (2023) / STEP HFpEF trial<sup>3</sup></b> |         | Adults with LVEF $\geq 45\%$ ; BMI $\geq 30$ ; NYHA class II, III, or IV symptoms; KCCQ-CSS score $< 90$ points; 6MWT $\geq 100$ m; and at least 1 of the following: elevated LV filling pressures, elevated natriuretic peptide levels plus echocardiographic abnormalities, or hospitalization for HF in the 12 months before screening plus ongoing treatment with diuretics or echocardiographic abnormalities | 529 | 69 | 297 (56.1) | Semaglutide (2.4 mg QW)          | Placebo                                                 | 52 weeks | Change from baseline in the Kansas City Cardiomyopathy Questionnaire clinical summary score (KCCQ-CSS) |
| <b>Ferdinand et al. (2014)<sup>66</sup></b>                  | Phase 3 | Patients with T2DM, on $\geq 1$ oral antihyperglycemic medication for $\geq 1$ month                                                                                                                                                                                                                                                                                                                               | 755 | 57 | 363 (48.1) | Dulaglutide (1.5mg or 0.75mg QW) | Placebo                                                 | 26 weeks | Change in mean 24-hour SBP                                                                             |
| <b>Kumarathurai et al. (2016)<sup>36</sup></b>               | Phase 2 | Adults with T2DM and stable CAD                                                                                                                                                                                                                                                                                                                                                                                    | 41  | 62 | 9 (22.0)   | Liraglutide (1.8 mg BID)         | Placebo                                                 | 24 weeks | Change in LVEF                                                                                         |
| <b>Faber et al. (2015)<sup>31</sup></b>                      |         | Adults with T2DM on monotherapy with metformin or SU or a combination                                                                                                                                                                                                                                                                                                                                              | 20  | 57 | 5 (25.0)   | Liraglutide (1.2 mg OD)          | Usual diabetic therapy (Metformin or SU or combination) | 10 weeks | Effect on coronary microcirculation, estimated by CFR                                                  |
| <b>Buse et al. (2011)<sup>70</sup></b>                       | Phase 2 | Adults with T2DM, receiving insulin glargine at a minimum of 20 U/day                                                                                                                                                                                                                                                                                                                                              | 259 | 59 | 111 (42.9) | Exenatide (10 $\mu$ g BID)       | Placebo                                                 | 30 weeks | Change in HbA1c                                                                                        |

|                                                                  |         |                                                                                                              |     |    |            |                                           |         |          |                                                                                                                      |
|------------------------------------------------------------------|---------|--------------------------------------------------------------------------------------------------------------|-----|----|------------|-------------------------------------------|---------|----------|----------------------------------------------------------------------------------------------------------------------|
| <b>Chen et al. (2015)</b> <sup>83</sup>                          | Phase 3 | Patients with NSTEMI                                                                                         | 90  | 58 | 24 (26.7)  | Liraglutide (1.8 mg OD)                   | Placebo | 1 week   | Change in LVEF                                                                                                       |
| <b>Kumarathurai et al. (2021)</b> <sup>38</sup>                  | Phase 2 | Overweight patients with stable CAD, LVEF >40% and T2DM                                                      | 30  | 63 | 6 (20.0)   | Liraglutide (1.8 mg OD)                   | Placebo | 24 weeks | Change in diastolic function parameters                                                                              |
| <b>Whicher et al (2021)</b> <sup>49</sup>                        | Phase 2 | Adults with schizophrenia, schizoaffective or first-episode psychosis who are overweight or obese            | 47  | 43 | 13 (27.7)  | Liraglutide (3 mg OD)                     | Placebo | 24 weeks | Estimate of adherence to investigational product                                                                     |
| <b>Davies et al. (2015) / SCALE Diabetes Trial</b> <sup>81</sup> | Phase 3 | Adults with T2DM treated with diet and exercise alone or in combination with 1 to 3 oral hypoglycemic agents | 827 | 55 | 421 (50.9) | Liraglutide (3.0 mg or 1.8 mg OD)         | Placebo | 56 weeks | Relative change in BW, proportion of participants losing 5% or more of BW, and proportion losing more than 10% of BW |
| <b>Kuhadiya et al. (2016)</b> <sup>35</sup>                      | Phase 4 | Adults with T1DM, with fasting C-peptide < 0.1 nmol/L                                                        | 63  | 43 | 35 (55.6)  | Liraglutide (0.6 mg, 1.2 mg or 1.6 mg OD) | Placebo | 12 weeks | Change in mean weekly BG concentrations                                                                              |
| <b>de Wit et al. (2014) / ELEGANT Trial</b> <sup>24</sup>        | Phase 2 | Adults with T2DM who had documented weight gain of ≥4% body weight since initiation of insulin treatment.    | 50  | 57 | 19 (38.0)  | Liraglutide (1.8 mg OD)                   | Placebo | 26 weeks | Change in BW                                                                                                         |
| <b>Klausen et al. (2022)</b> <sup>73</sup>                       | Phase 2 | AUD patients who had a minimum of 5 heavy drinking days in the past 30 days                                  | 127 | 52 | 51 (40.2)  | Exenatide (2 mg QW)                       | Placebo | 26 weeks | Reduction in number of heavy drinking days.                                                                          |

|                                                            |         |                                                                                                                                  |       |    |              |                         |                        |          |                                                                                                                       |
|------------------------------------------------------------|---------|----------------------------------------------------------------------------------------------------------------------------------|-------|----|--------------|-------------------------|------------------------|----------|-----------------------------------------------------------------------------------------------------------------------|
| <b>Mensberg et al. (2016)</b> <sup>44</sup>                | Phase 2 | Adults with T2DM treated with diet and/or metformin and sedentary lifestyle                                                      | 33    | 57 | 10 (30.3)    | Liraglutide (1.8 mg OD) | Placebo                | 16 weeks | Change in HbA1c                                                                                                       |
| <b>Miyagawa et al. (2015)</b> <sup>68</sup>                | Phase 3 | Adults who were OAM-naïve or had discontinued OAM monotherapy                                                                    | 492   | 57 | 91 (18.5)    | Liraglutide (0.9 mg OD) | Placebo or Dulaglutide | 26 weeks | Change in HbA1c                                                                                                       |
| <b>Lundgren et al. (2021)</b> <sup>42</sup>                | Phase 3 | Obese adults                                                                                                                     | 195   | 43 | 124 (63.6)   | Liraglutide (3 mg OD)   | Placebo                | 48 weeks | Change in BW                                                                                                          |
| <b>Guja et al. (2017) / DURATION-7 Trial</b> <sup>77</sup> | Phase 3 | Adults with T2DM, on an insulin regimen in combination with diet and exercise or with metformin                                  | 461   | 58 | 240 (52.1)   | Exenatide (2 mg QW)     | Placebo                | 28 weeks | Change in HbA1c                                                                                                       |
| <b>Matikainen et al. (2018)</b> <sup>43</sup>              | Phase 2 | Obese patients with T2DM, under treatment with lifestyle changes or metformin                                                    | 22    | 62 | 6 (27.3)     | Liraglutide (1.8 mg OD) | Placebo                | 16 weeks | Changes in weight, HbA1c, β-hydroxybutyrate and SBP                                                                   |
| <b>Liakos et al. (2018)</b> <sup>41</sup>                  | Phase 2 | Adult patients with inadequately controlled T2DM despite stable antihyperglycemic therapy                                        | 62    | 61 | 21 (33.9)    | Liraglutide (1.2 mg OD) | Placebo                | 5 weeks  | Change in 24-hour ambulatory SBP                                                                                      |
| <b>Pi-Sunyer et al. (2015)</b> <sup>45</sup>               | Phase 3 | Obese adults who had stable body weight                                                                                          | 3,731 | 45 | 2,928 (78.5) | Liraglutide (3 mg OD)   | Placebo                | 56 weeks | Weight change, the proportion of patients who lost at least 5%, and those who lost more than 10% of their baseline BW |
| <b>Larsen et al. (2017)</b> <sup>39</sup>                  | Phase 2 | Overweight or obese adults with a schizophrenia spectrum disorder who were receiving clozapine or olanzapine and had prediabetes | 103   | 42 | 37 (38.1)    | Liraglutide (1.8 mg OD) | Placebo                | 16 weeks | Change in glucose tolerance                                                                                           |



|                                                                 |          |                                                                                                                                   |     |    |            |                                   |                     |           |                                                                       |
|-----------------------------------------------------------------|----------|-----------------------------------------------------------------------------------------------------------------------------------|-----|----|------------|-----------------------------------|---------------------|-----------|-----------------------------------------------------------------------|
| <b>Liutkus et al. (2010)</b> <sup>74</sup>                      | Phase 3  | Adults with T2DM, with suboptimal glycemic control while taking stable doses of TZD therapy or combined metformin and TZD therapy | 165 | 55 | 67 (40.6)  | Exenatide (10 mcg BID)            | Placebo             | 26 weeks  | Change in HbA1c                                                       |
| <b>Bojer et al. (2021)</b> <sup>29</sup>                        | Phase 3  | Adults with T2DM with signs of diastolic dysfunction                                                                              | 40  | 62 | 8 (20.0)   | Liraglutide (1.8 mg OD)           | Placebo             | 18 weeks  | Change in left ventricle ePFR and left atrium PEF                     |
| <b>Sandsdal et al. (2023)</b> <sup>46</sup>                     | Phase 3  | Obese adults                                                                                                                      | 195 | 43 | 124 (63.6) | Liraglutide (3 mg OD)             | Placebo or Exercise | 52 weeks  | Change in MetS-Z, abdominal obesity, and CRP                          |
| <b>Wadden et al. (2019)</b> <sup>48</sup>                       | Phase 2  | Obese adults with prior lifetime weight loss effort with diet and exercise                                                        | 150 | 48 | 119 (79.3) | Liraglutide (3 mg OD)             | Behavioral Therapy  | 52 weeks  | Change in BW                                                          |
| <b>Garvey et al (2022) / STEP 5 Trial</b> <sup>54</sup>         | Phase 3  | Obese adults with at least one self-reported unsuccessful dietary effort to lose body weight                                      | 304 | 47 | 236 (77.6) | Semaglutide (2.4 mg QW)           | Placebo             | 104 weeks | Percentage change in BW and achievement of weight loss of at least 5% |
| <b>Rosenstock et al. (2018) / FREEDOM-1 Trial</b> <sup>80</sup> | Phase 3  | Adults with T2DM receiving stable treatment with diet and exercise alone or with metformin, SUs, or pioglitazone                  | 460 | 56 | 188 (40.9) | Exenatide (40 µg or 60 µg OD)     | Placebo             | 39 weeks  | Change in HbA1c                                                       |
| <b>Mok et al. (2023) / BARI-OPTIMISE Trial</b> <sup>25</sup>    | Phase 3a | Patients with poor weight loss after metabolic surgery and a suboptimal nutrient-stimulated GLP-1 response                        | 70  | 46 | 52 (74.3)  | Liraglutide (3.0 mg OD)           | Placebo             | 24 weeks  | Percentage change in BW                                               |
| <b>Rodbard et al. (2018) / SUSTAIN 5</b>                        | Phase 2  | Adults with T2DM receiving stable basal insulin therapy alone or in                                                               | 396 | 47 | 174 (43.9) | Semaglutide (0.5 mg or 1.0 mg QW) | Placebo             | 30 weeks  | Change in HbA1c                                                       |

| Trial <sup>59</sup>                                      |          | combination with metformin                                                                                         |     |    |            |                                                 |                                     |          |                                                                                                             |
|----------------------------------------------------------|----------|--------------------------------------------------------------------------------------------------------------------|-----|----|------------|-------------------------------------------------|-------------------------------------|----------|-------------------------------------------------------------------------------------------------------------|
| Lind et al. (2015) / MDI Liraglutide trial <sup>26</sup> | Phase 3a | Overweight or obese adults with T2DM treated with multiple daily insulin injections                                | 124 | 59 | 44 (35.5)  | Liraglutide (1.8 mg OD)                         | Placebo                             | 24 weeks | Change in HbA1c                                                                                             |
|                                                          |          |                                                                                                                    |     |    |            |                                                 |                                     |          |                                                                                                             |
| Gullaksen et al. (2023) <sup>62</sup>                    | Phase 3  | Patients with T2DM, with established CVD, heart failure or CKD                                                     | 80  | 64 | 19 (23.8)  | Semaglutide (1.0 mg QW)                         | Placebo or Empagliflozin            | 16 weeks | Improvement in kidney tissue oxygenation                                                                    |
| Dushay et al. (2012) <sup>71</sup>                       | Phase 3  | Overweight or obese adult women without diabetes                                                                   | 41  | 70 | 41 (100.0) | Exenatide (10 ug BID)                           | Placebo                             | 16 weeks | Change in body weight and BMI                                                                               |
| Astrup et al. (2009) <sup>28</sup>                       | Phase 3  | Obese adults                                                                                                       | 564 | 48 | 429 (76.1) | Liraglutide (1.2 mg, 1.8 mg, 2.4 mg or 3 mg OD) | Placebo or Orlistat                 | 20 weeks | Change in BW                                                                                                |
| Armstrong et al. (2006) / LEAN Trial <sup>27</sup>       | Phase 3  | Overweight patients who have clinical evidence of non-alcoholic steatohepatitis                                    | 52  | 46 | 31 (59.6)  | Liraglutide (1.8 mg OD)                         | Placebo                             | 48 weeks | Number of patients with paired liver biopsies and patients with resolution of non-alcoholic steatohepatitis |
| Apovian et al. (2010) <sup>69</sup>                      | Phase 2  | Overweight or obese adults with T2DM on a stable dose of metformin or SU, and with a history of stable body weight | 194 | 50 | 121 (62.4) | Exenatide (10 ug BID)                           | Placebo and Lifestyle Modifications | 24 weeks | Change in BW                                                                                                |

**Abbreviations:** AUD=alcohol use disorder; BG=blood glucose; BID=twice a day; BMI=body mass index; BW=body weight; CAD=coronary artery disease; CFR=coronary flow reserve; CHF=congestive heart failure; CKD=chronic kidney disease; CRP=C-reactive protein; CSII=continuous subcutaneous insulin infusion; CVD=cardiovascular disease; DBP=diastolic blood pressure; ePFR=early peak filling rate; ESRD=end stage renal disease; HR=heart rate; LF/HF=low frequency to high frequency; LVEF=left ventricular ejection fraction; MACE=major adverse cardiovascular events; NSTEMI=non-ST elevation myocardial infarction; OAM=oral antihyperglycemic medication; OD=once a day; PEF=passive emptying fraction; QW=once a week; SBP=systolic blood pressure; SC=subcutaneous; SU=sulfonylurea; T1DM=type 1 diabetes mellitus; T2DM=type 2 diabetes mellitus; TZD=thiazolidinedione

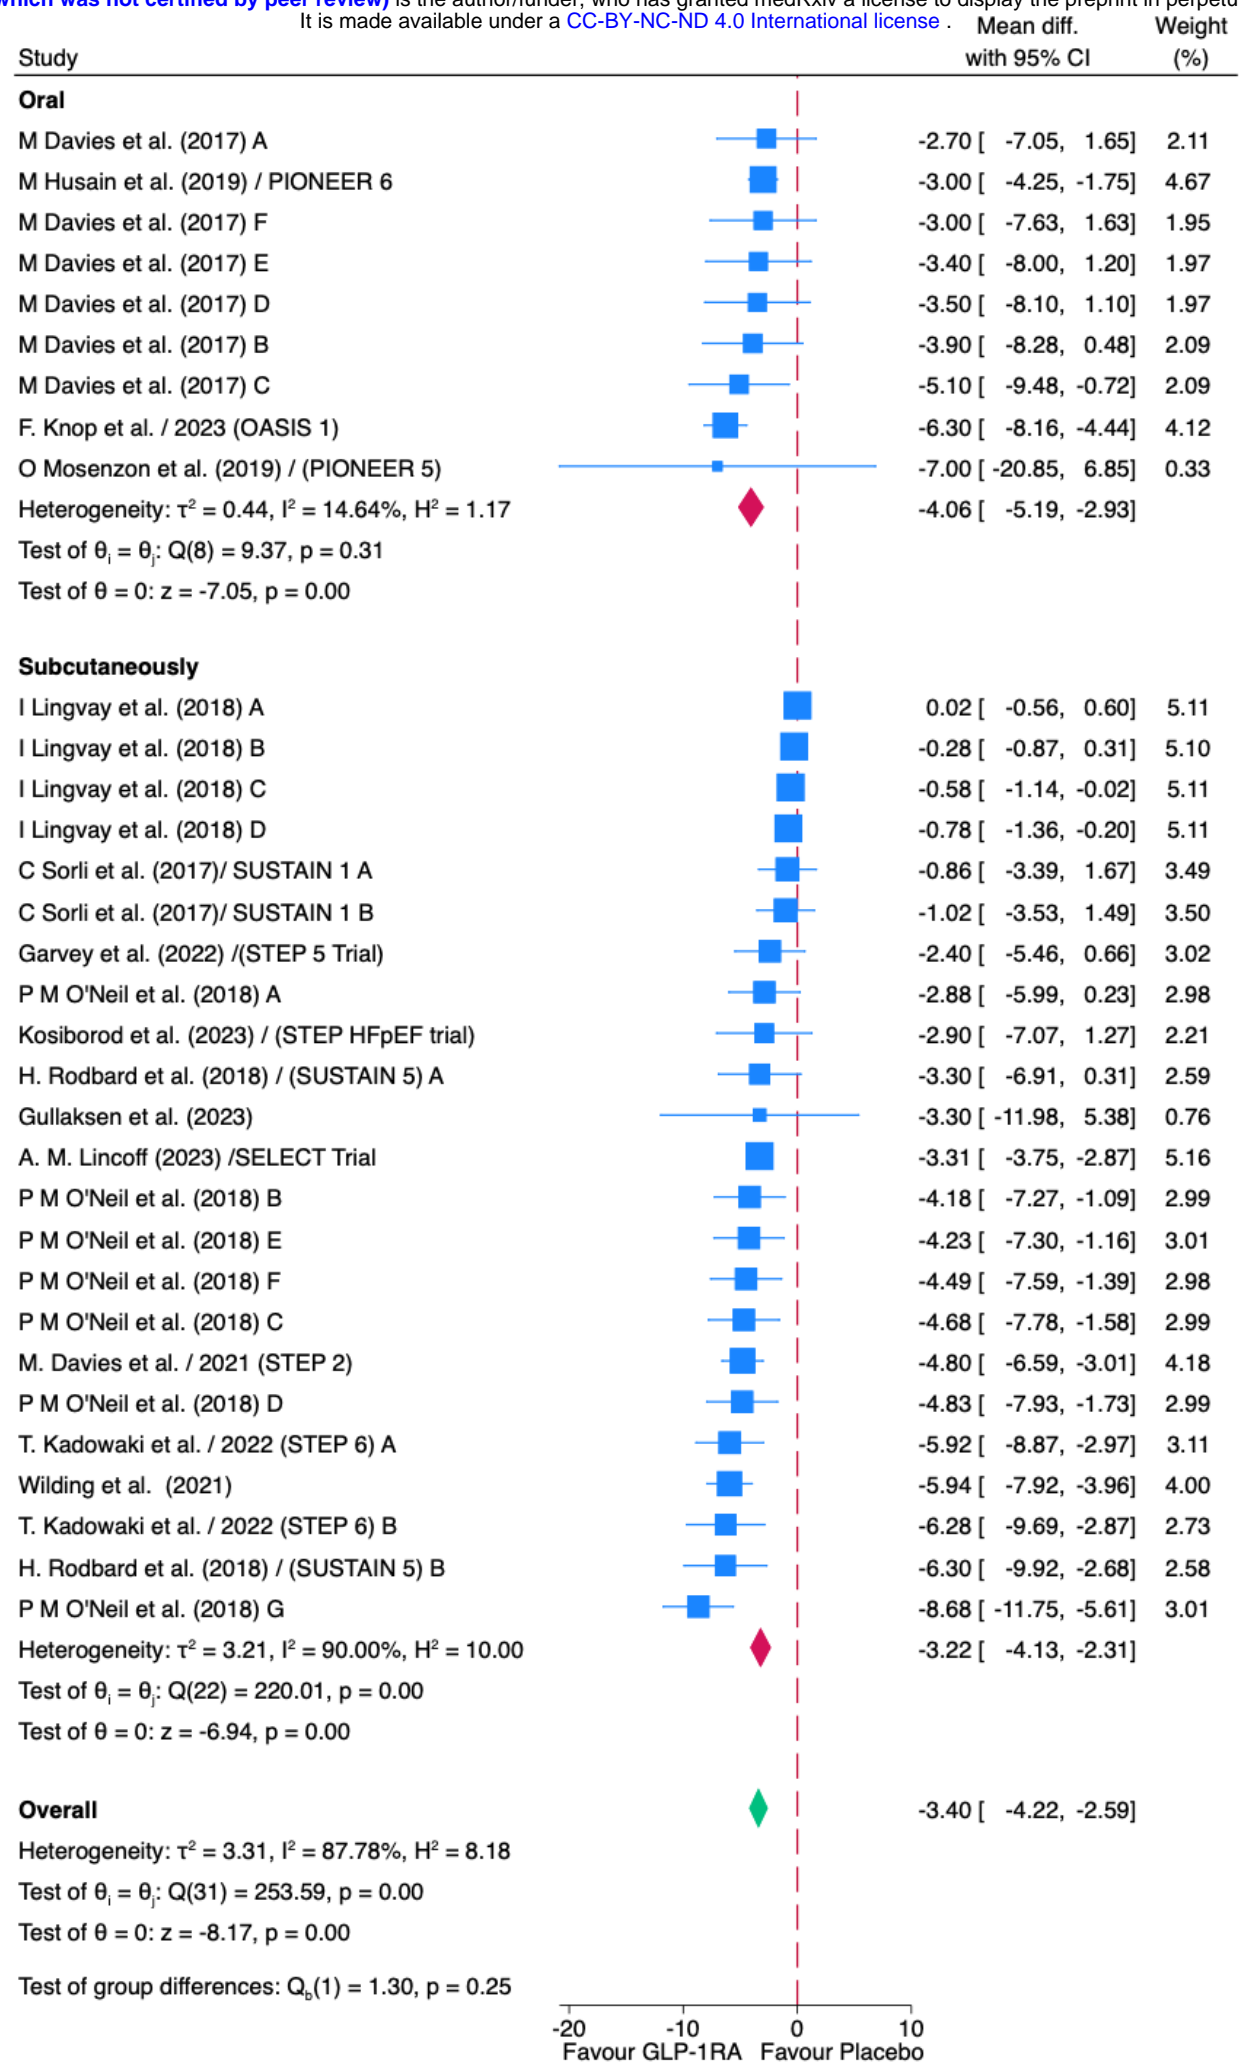

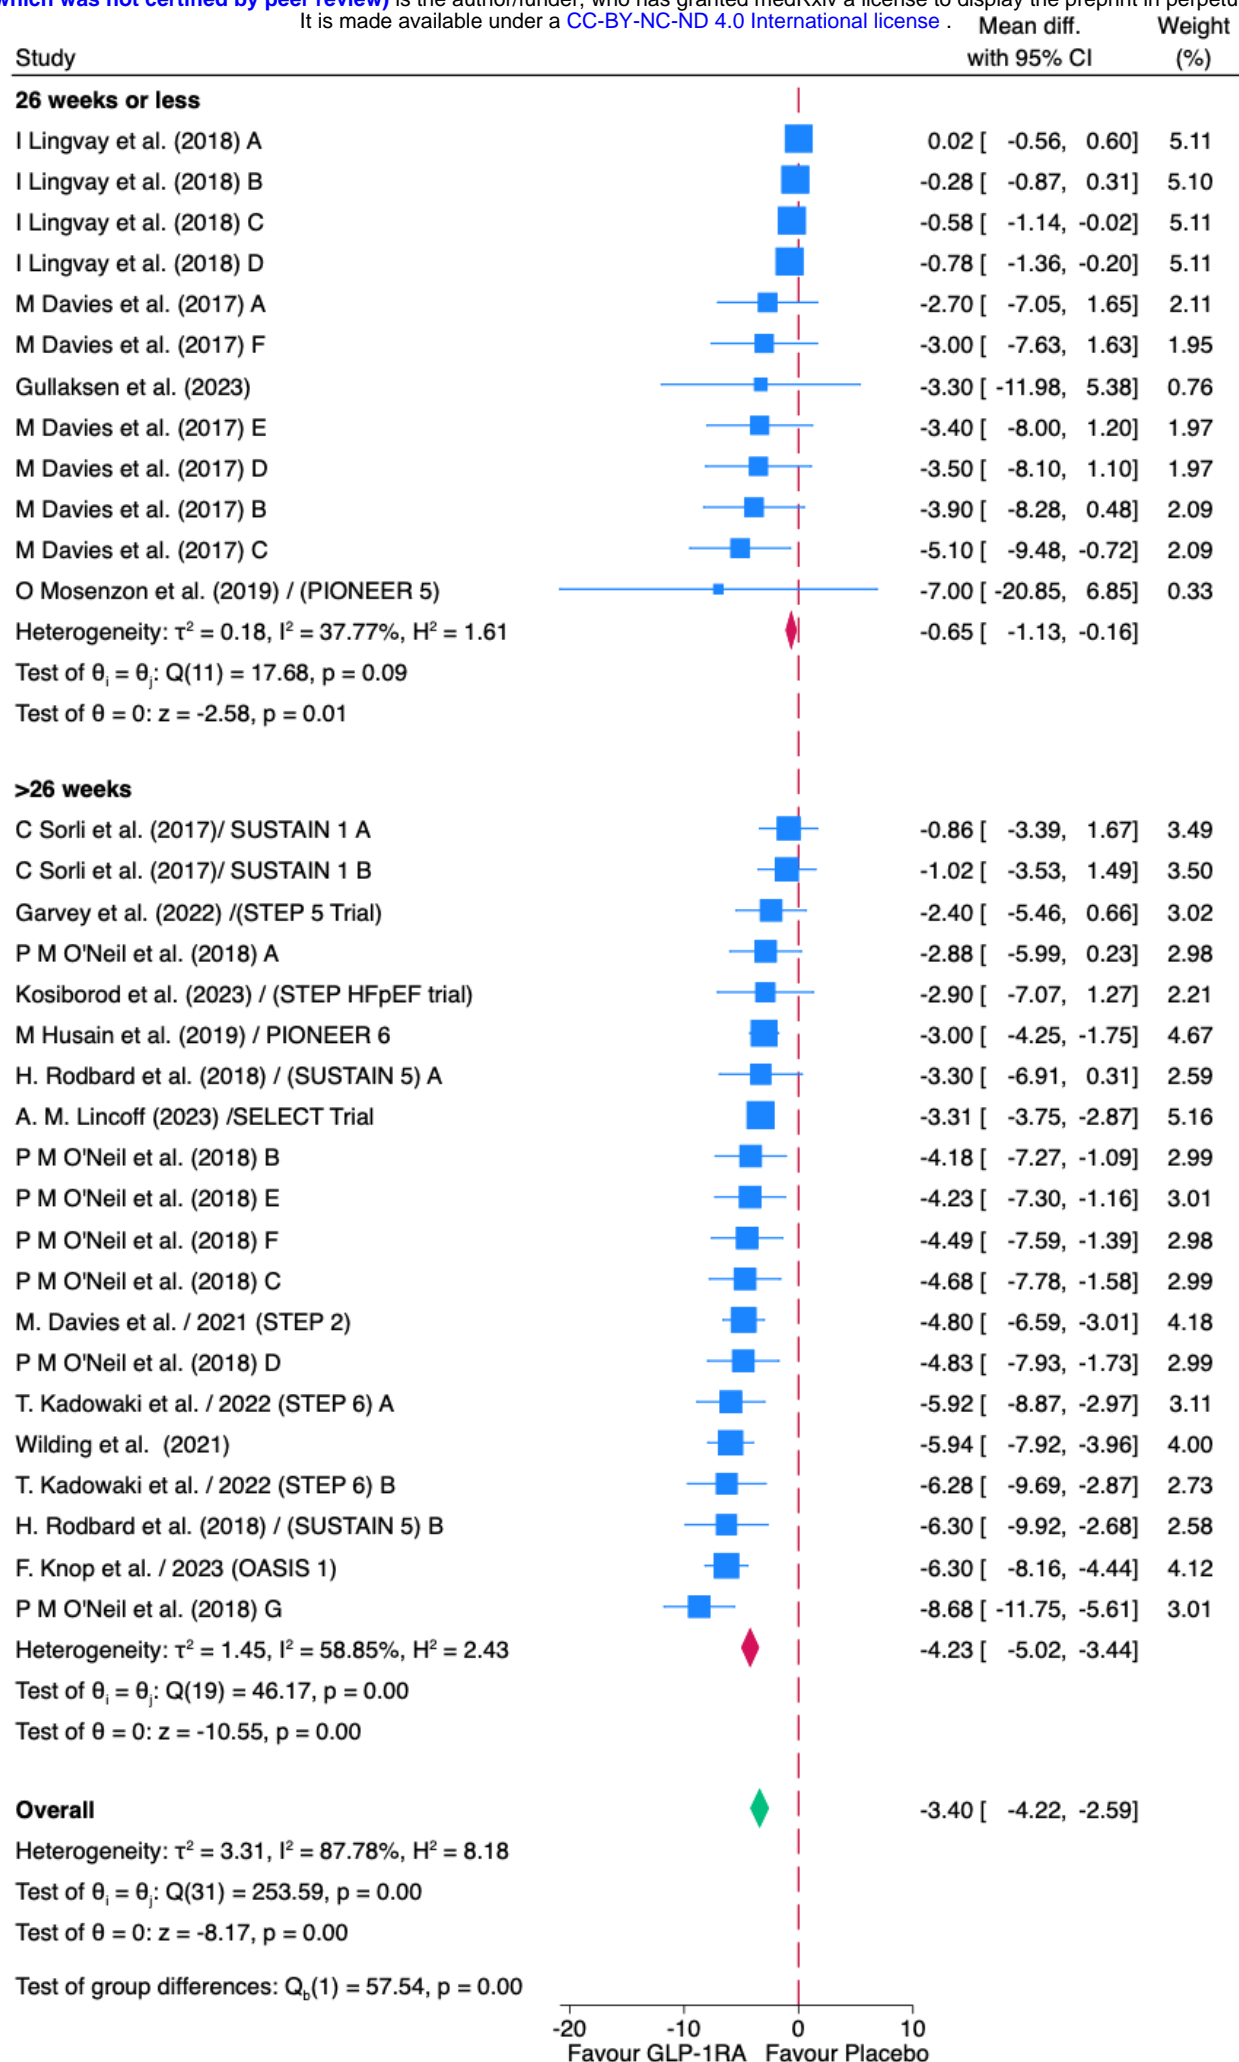

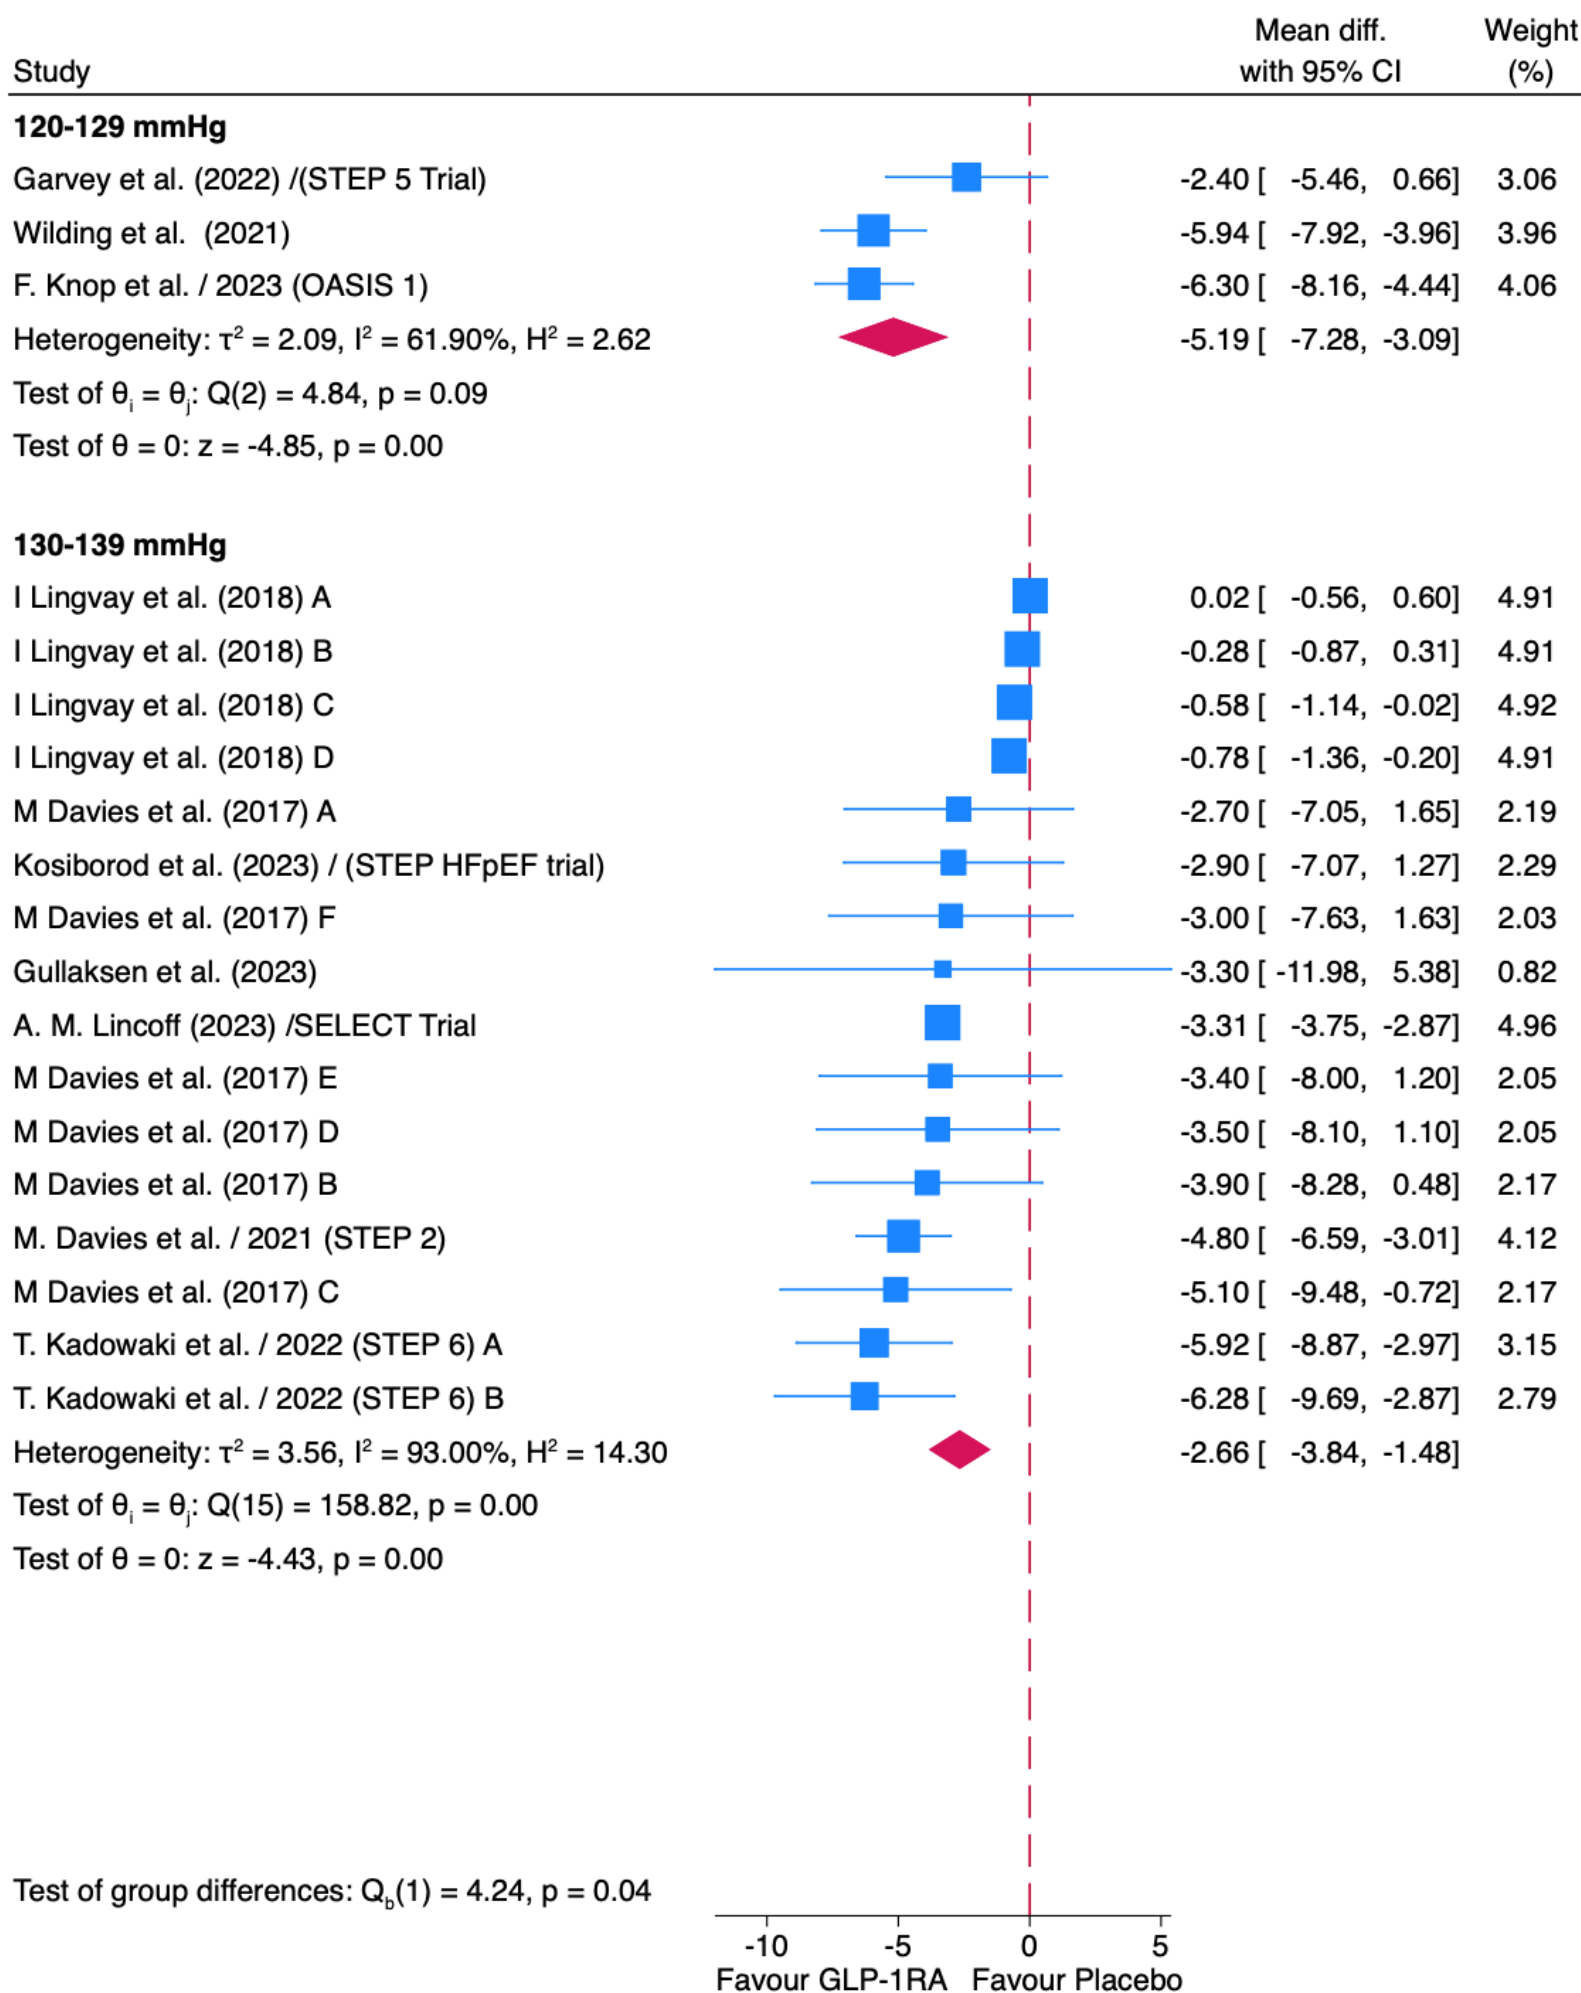

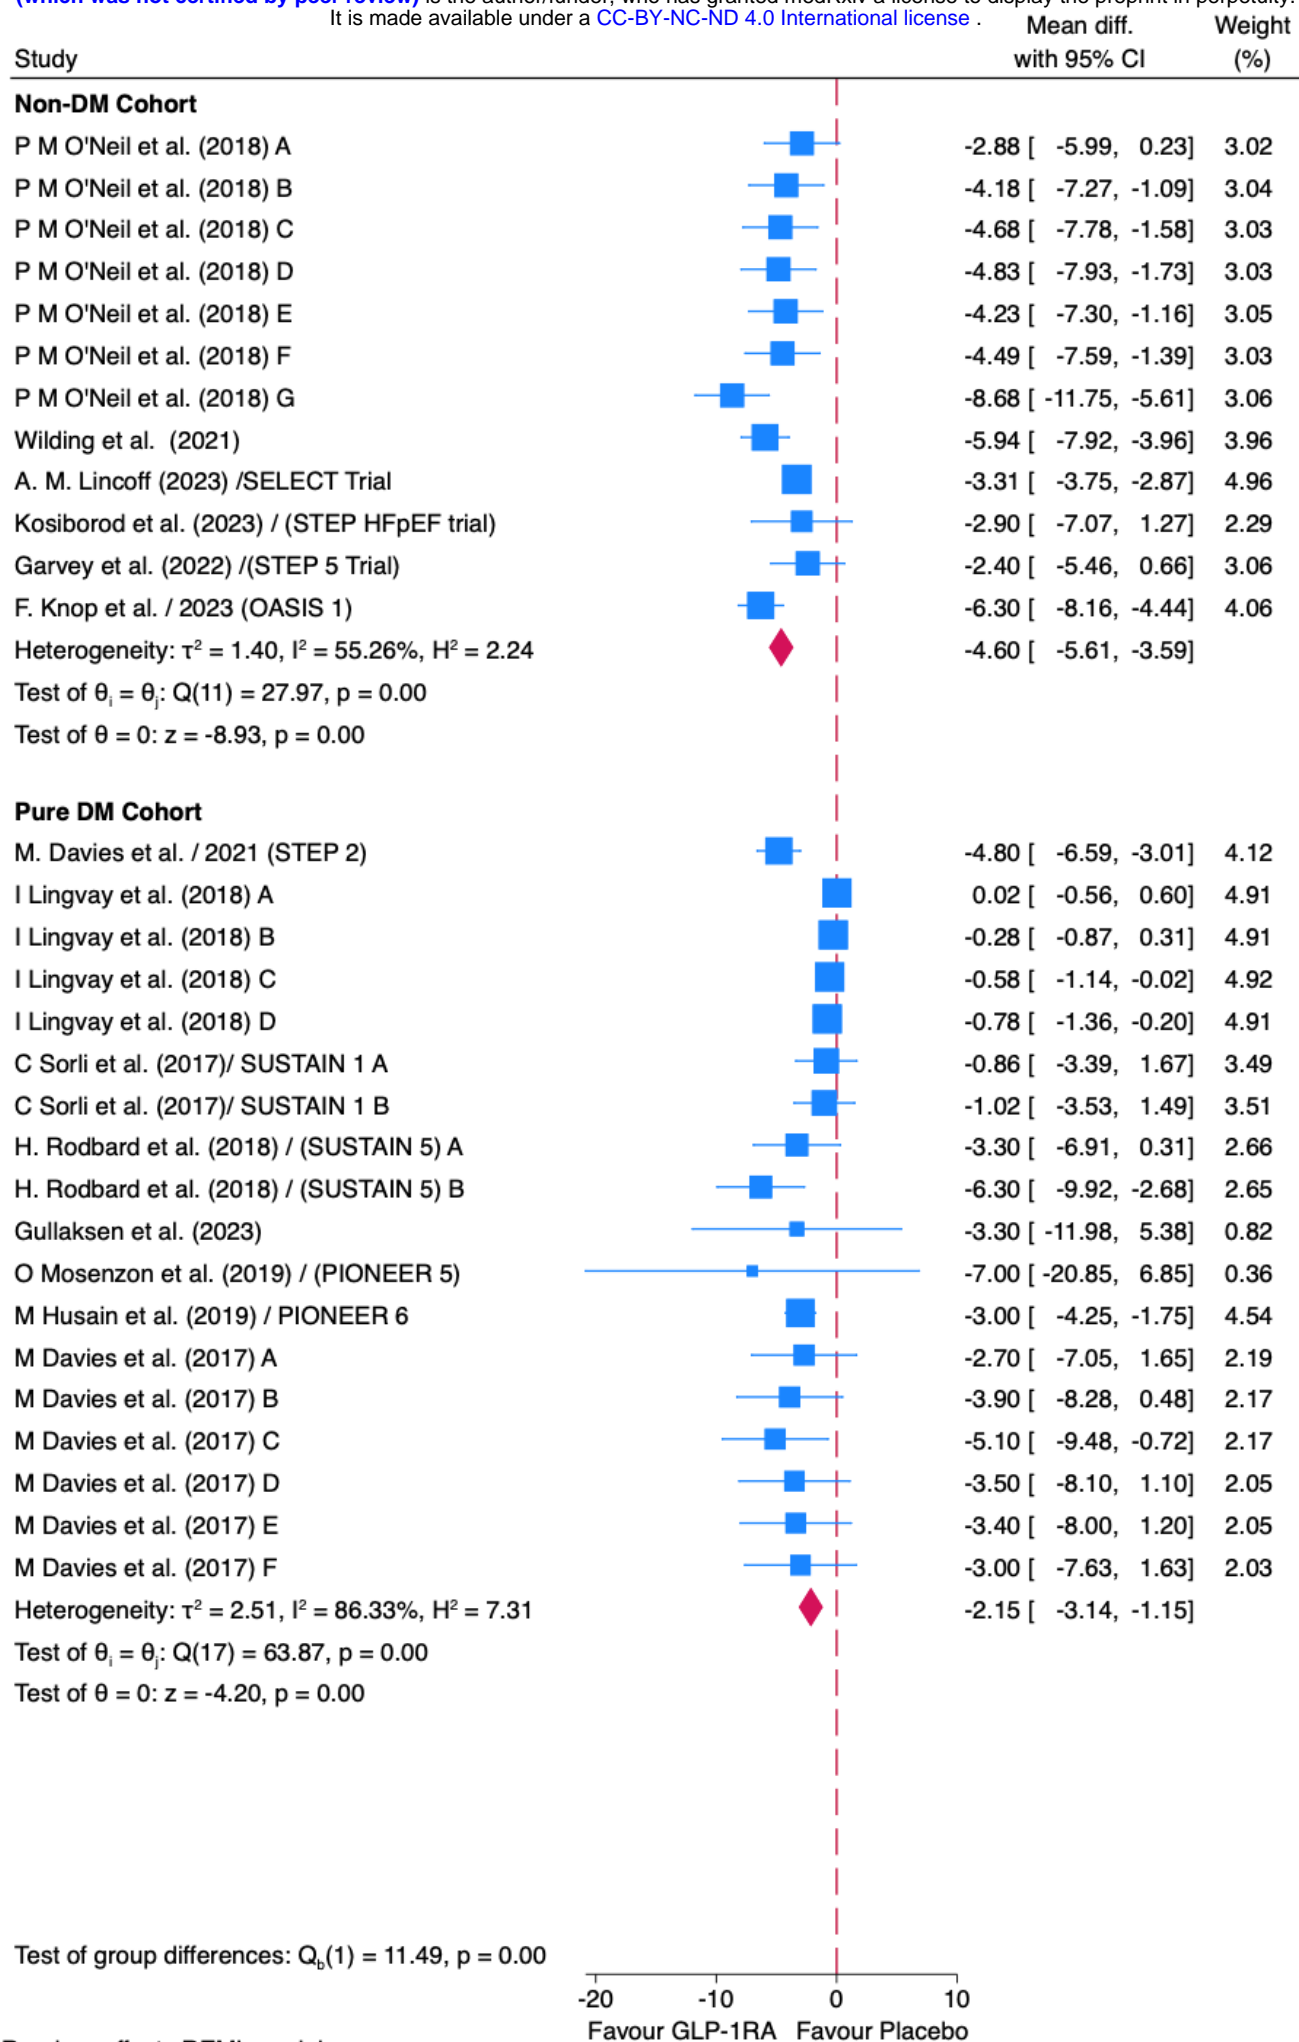



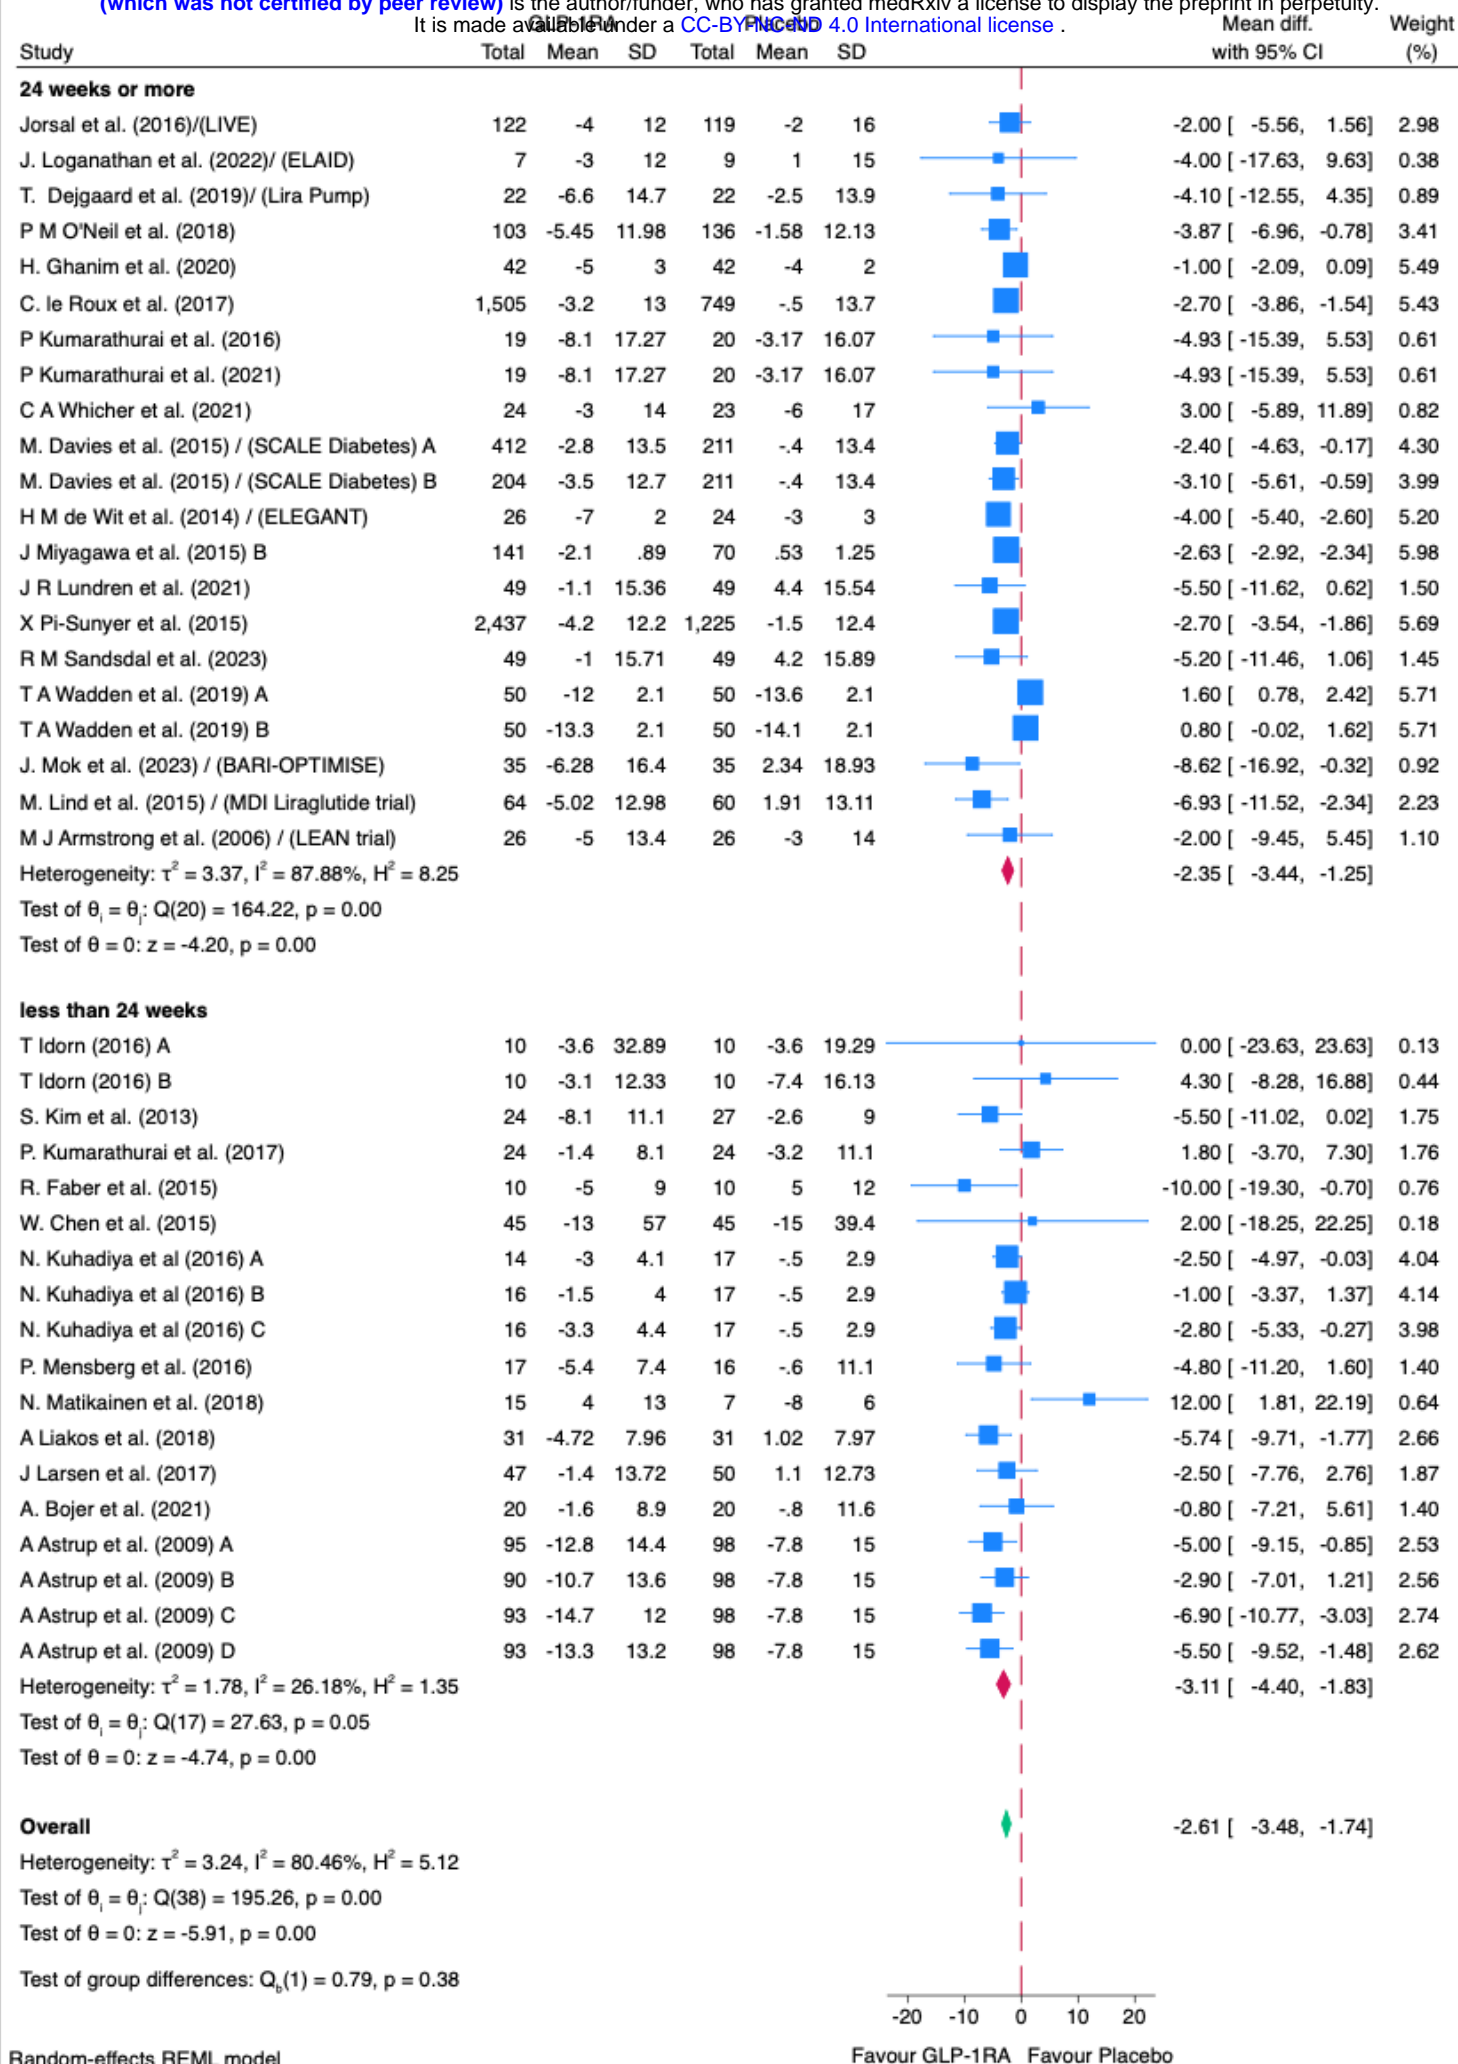

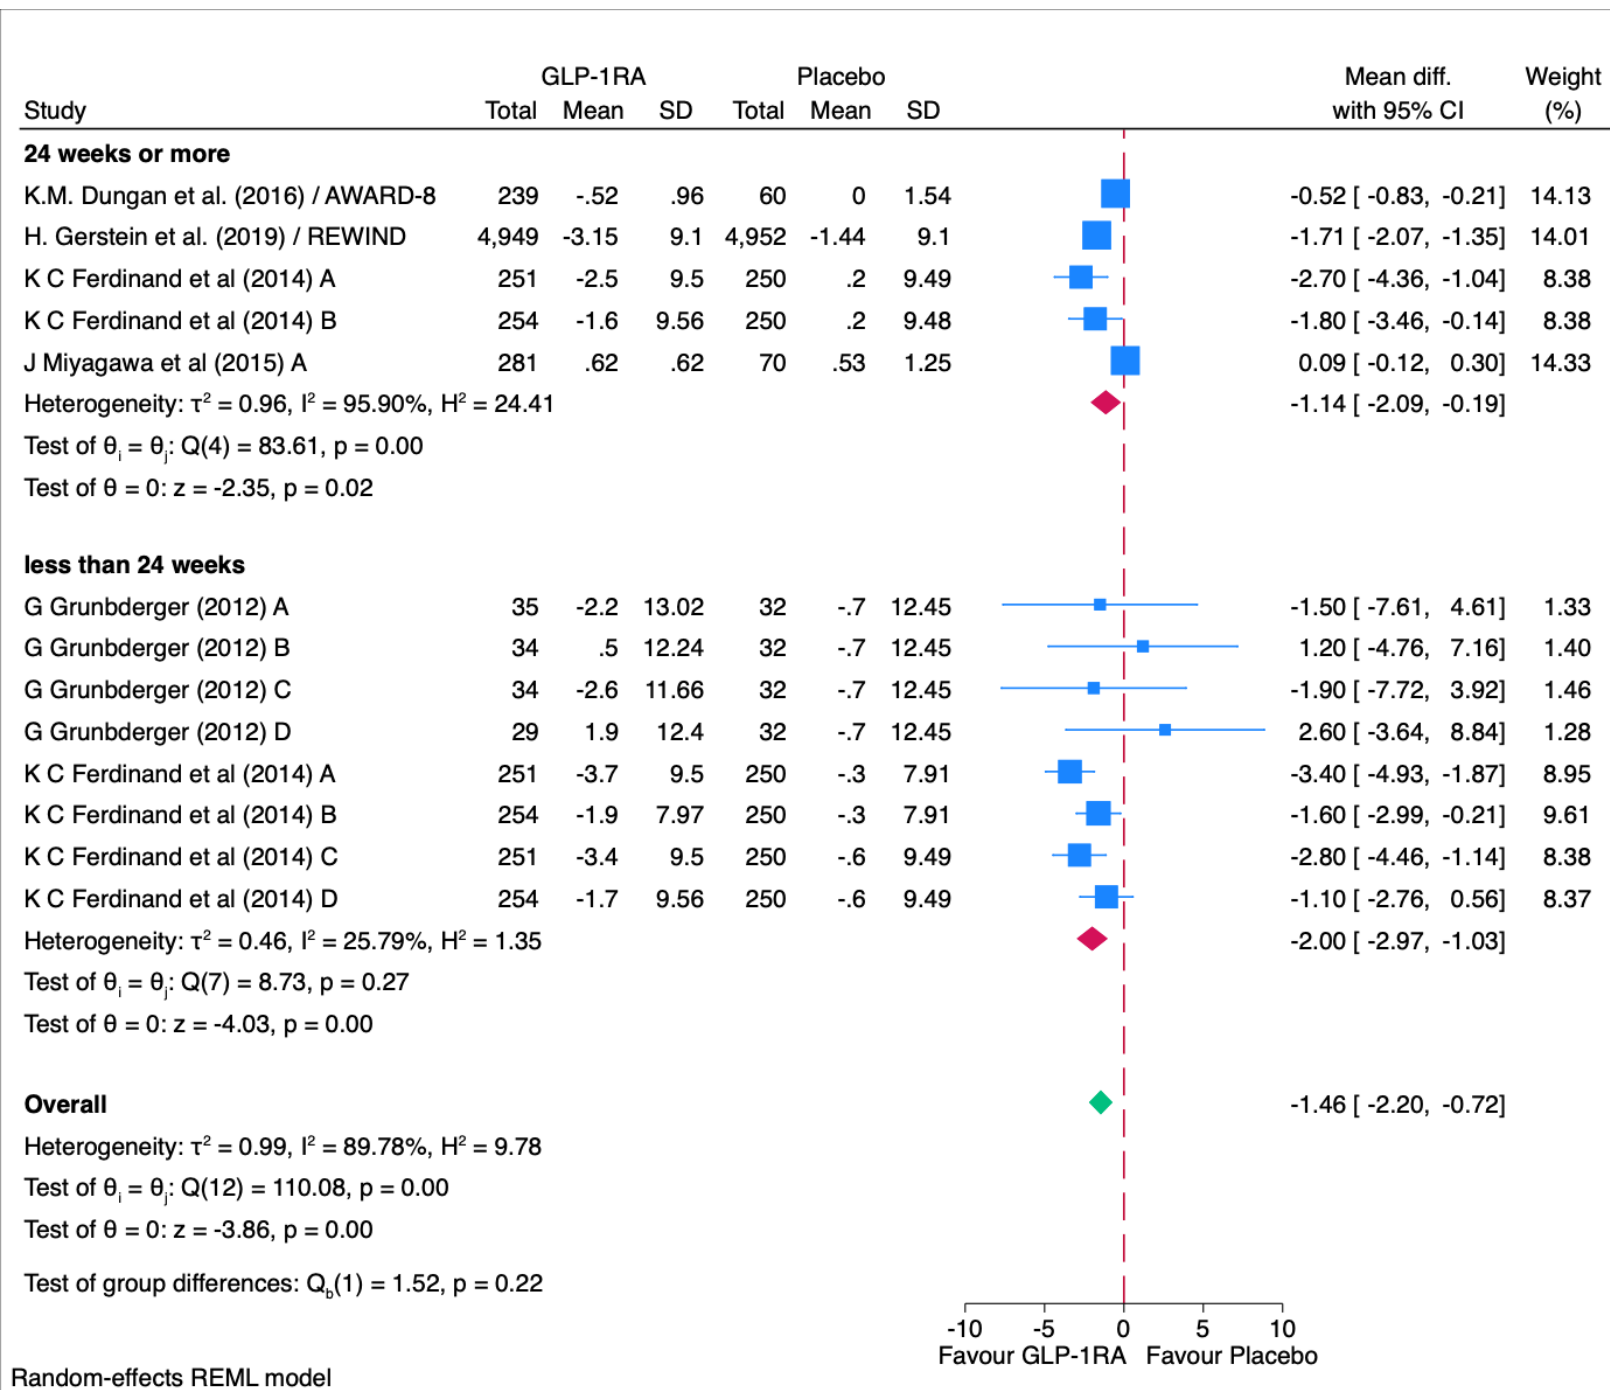

Source: http://medrxiv.stage.highwire.org/content/10.1101/2024.01.29.24301971v1.full.pdf
